# Supplementary material for: The STROBE extensions: protocol for a qualitative assessment of content and a survey of endorsement
Source: PubMed Central journal article supplement — BMJ Open. 2017 Oct 22;7(10):e019043. doi: 10.1136/bmjopen-2017-019043 (PMC5665297; doi:10.1136/bmjopen-2017-019043), 2017-10-22
Supplement: bmjopen-2017-019043.draft_revisions.pdf [file bmjopen-2017-019043.draft_revisions.pdf]

# BMJ Open

BMJ Open is committed to open peer review. As part of this commitment we make the peer review history of every article we publish publicly available.

When an article is published we post the peer reviewers' comments and the authors' responses online. We also post the versions of the paper that were used during peer review. These are the versions that the peer review comments apply to.

The versions of the paper that follow are the versions that were submitted during the peer review process. They are not the versions of record or the final published versions. They should not be cited or distributed as the published version of this manuscript.

BMJ Open is an open access journal and the full, final, typeset and author-corrected version of record of the manuscript is available on our site with no access controls, subscription charges or pay-per-view fees (<http://bmjopen.bmj.com>).

If you have any questions on BMJ Open's open peer review process please email [editorial.bmjopen@bmj.com](mailto:editorial.bmjopen@bmj.com)

# BMJ Open

## The STROBE extensions: A protocol for a qualitative assessment of content and a survey of endorsement

|                                 |                                                                                                                                                                                                                                                                                                                                                                                                                                                                                                                                                                                                                                                                              |
|---------------------------------|------------------------------------------------------------------------------------------------------------------------------------------------------------------------------------------------------------------------------------------------------------------------------------------------------------------------------------------------------------------------------------------------------------------------------------------------------------------------------------------------------------------------------------------------------------------------------------------------------------------------------------------------------------------------------|
| Journal:                        | <i>BMJ Open</i>                                                                                                                                                                                                                                                                                                                                                                                                                                                                                                                                                                                                                                                              |
| Manuscript ID                   | bmjopen-2017-019043                                                                                                                                                                                                                                                                                                                                                                                                                                                                                                                                                                                                                                                          |
| Article Type:                   | Protocol                                                                                                                                                                                                                                                                                                                                                                                                                                                                                                                                                                                                                                                                     |
| Date Submitted by the Author:   | 08-Aug-2017                                                                                                                                                                                                                                                                                                                                                                                                                                                                                                                                                                                                                                                                  |
| Complete List of Authors:       | Sharp, Melissa K; Universite Paris Descartes, Pierre Louis Doctoral School: Epidemiology and Biomedical Sciences; Sveuciliste u Splitu, Department of Psychology, Faculty of Humanities and Social Sciences<br>Utrobičić, Ana; Sveuciliste u Splitu, School of Medicine<br>Gómez, Guadalupe; Universitat Politecnica de Catalunya, Departament d'Estadística i Investigació Operativa<br>Cobo, Erik; Universitat Politecnica Catalunya, Departament d'Estadística i Investigació Operativa<br>Wager, Elizabeth; Sideview; Sveuciliste u Splitu, School of Medicine<br>Hren, Darko; Sveuciliste u Splitu, Department of Psychology, Faculty of Humanities and Social Sciences |
| <b>Primary Subject Heading</b>: | Medical publishing and peer review                                                                                                                                                                                                                                                                                                                                                                                                                                                                                                                                                                                                                                           |
| Secondary Subject Heading:      | Research methods                                                                                                                                                                                                                                                                                                                                                                                                                                                                                                                                                                                                                                                             |
| Keywords:                       | Reporting Guidelines, STROBE, observational studies, information dissemination/methods, bibliometrics                                                                                                                                                                                                                                                                                                                                                                                                                                                                                                                                                                        |
|                                 |                                                                                                                                                                                                                                                                                                                                                                                                                                                                                                                                                                                                                                                                              |

SCHOLARONE™  
Manuscripts

1  
2  
3  
4 1  
5 2  
6  
7 3  
8  
9 4 The STROBE extensions: A protocol for a qualitative assessment of content and a survey of  
10 5 endorsement  
11  
12 6

13  
14 7 Melissa K. Sharp<sup>1,2</sup>, Ana Utrobičić<sup>3</sup>, Guadalupe Gómez<sup>4</sup>, Erik Cobo<sup>4</sup>, Elizabeth Wager<sup>5,3</sup>, Darko  
15 8 Hren<sup>1</sup>  
16  
17 9

18  
19 10 <sup>1</sup> University of Split, Department of Psychology, Faculty of Humanities and Social Sciences,  
20 11 Split, Croatia

21  
22 12 <sup>2</sup> Université Paris Descartes, Sorbonne Paris Cité, Pierre Louis Doctoral School: Epidemiology  
23 13 and Biomedical Sciences, Paris, France

24  
25 14 <sup>3</sup> University of Split, School of Medicine, Split, Croatia

26  
27 15 <sup>4</sup> Universitat Politècnica de Catalunya-BarcelonaTech, Departament d'Estadística i Investigació  
28 16 Operativa, Barcelona, Spain

29  
30 17 <sup>5</sup> Sideview, Buckinghamshire, United Kingdom  
31  
32 18

33 19  
34  
35 20  
36  
37 21 \*Corresponding author:

38  
39 22 Melissa K Sharp

40  
41 23 University of Split

42  
43 24 Livanjska ulica 5, Split, Croatia 21000

44  
45 25 Email: [msharp@unist.hr](mailto:msharp@unist.hr)

46  
47 26 Tel: +1 248 701 8109; +385 097 632 4542  
48  
49 27

50  
51 28 **Word Count:** 2276  
52  
53 29  
54  
55  
56  
57  
58  
59  
60

1  
2  
3  
4  
5  
6  
7  
8  
9  
10  
11  
12  
13  
14  
15  
16  
17  
18  
19  
20  
21  
22  
23  
24  
25  
26  
27  
28  
29  
30  
31  
32  
33  
34  
35  
36  
37  
38  
39  
40  
41  
42  
43  
44  
45  
46  
47  
48  
49  
50  
51  
52  
53  
54  
55  
56  
57  
58  
59  
60

## 30 Abstract

31 **Introduction:** The STrengthening the Reporting of OBServational studies in Epidemiology  
32 (STROBE) guideline was developed in response to inadequate reporting of observational studies.  
33 In recent years, several extensions to STROBE have been created to provide more nuanced field-  
34 specific guidance for authors. The content and the prevalence of extension endorsement has not  
35 yet been assessed. Accordingly, there are two aims: 1) to classify changes made in the extensions  
36 to identify strengths and weaknesses of the original STROBE checklist; and 2) to determine the  
37 prevalence and typology of endorsement by journals in fields related to extensions.

38 **Methods and analysis:** Two independent researchers will assess additions in each extension.  
39 Additions will be coded as “field-specific” (FS) or “not field-specific” (NFS). FS is defined as  
40 particularly relevant information for a single field and guidance provided generally cannot be  
41 extrapolated beyond that field. NFS is defined as information that reflects epidemiological or  
42 methodological tenets and can be generalized to most, if not all, types of observational research  
43 studies. Intra-class correlation (ICC) will be calculated to measure reviewers’ concordance.  
44 Upon disagreement, consensus will be reached. Individual additions will be grouped by  
45 STROBE checklist items to identify the frequency and distribution of changes.

46 Journals in fields related to extensions will be identified through National Library of Medicine  
47 (NLM) PubMed Broad Subject Terms, screened for eligibility, and further distilled via Ovid  
48 MEDLINE search strategies for observational studies. Text describing endorsement will be  
49 extracted from each journal’s website. A classification scheme will be created for endorsement  
50 types and the prevalence of endorsement will be estimated. Analyses will utilize NVivo 11 and  
51 SAS University Edition.

52 **Ethics and dissemination:** This study does not require ethical approval as it does not involve  
53 human participants. This study has been pre-registered on Open Science Framework.

54 **Word count:** 290

55 **Keywords:** Reporting guidelines, STROBE, observational studies, information  
56 dissemination/methods, bibliometrics

1  
2  
3 57 **Strengths and limitations of this study**  
4

- 5 58
- 6 59 • Our systematic approach to qualitatively assess the content of the additions made in the  
7 60 STROBE extensions provides a comprehensive overview of the types of changes made  
8 61 and can identify redundancies and problem areas.
  - 9 62 • Our method involves standardized search strategies in Ovid MEDLINE, ensured to  
10 63 capture a representative sample and circumvent issues of subjectivity in the identification  
11 64 of eligible journals
  - 12 65 • This study will create an open source corpus of recent observational studies spanning  
13 66 seven fields which future researchers can utilize to assess completeness of reporting or  
14 67 other topics of interest.
  - 15 68 • The bibliometric aspect of this study only focuses on 7 extensions and fields so results  
16 69 are not generalizable to other studies.  
17  
18  
19  
20  
21  
22  
23  
24  
25  
26  
27  
28  
29  
30  
31  
32  
33  
34  
35  
36  
37  
38  
39  
40  
41  
42  
43  
44  
45  
46  
47  
48  
49  
50  
51  
52  
53  
54  
55  
56  
57  
58  
59  
60

## 69 INTRODUCTION

70 The STrengthening the Reporting of OBServational studies in Epidemiology (STROBE)  
71 guidelines were developed in 2007 in response to the pervasiveness of inadequate reporting of  
72 observational studies. STROBE provides a checklist of items that serve as a reference for how to  
73 report sufficient information for observational research involving cohort, case-control, and cross-  
74 sectional studies [1]. The guidelines have been endorsed by the International Committee of  
75 Medical Journal Editors (ICMJE) and the accompanying checklist is sometimes explicitly used  
76 as a requirement for manuscript submission [2]. However, there is no standard method of  
77 endorsement by journals and little is known about the most effective ways to apply the  
78 guidelines in practice [3–5].

79 Regarding the reporting of clinical trials, requiring a completed Consolidated Standards  
80 of Reporting Trials (CONSORT) checklist upon submission of a manuscript has been shown to  
81 lead to improvements in reporting [6]. However, some journals do not want to take responsibility  
82 for guideline enforcement and many overlook non-adherence to guidelines; editors have  
83 expressed beliefs that their journal's current policies are adequate or that they fear losing authors  
84 to other journals that have less strict requirements for publication [7–9]. Editors may also be  
85 unaware of the existence of guidelines, as demonstrated by low endorsement rates by journals in  
86 dentistry [10], veterinary medicine [7], and urology [11]. On the other hand, the evidence for the  
87 endorsement of STROBE is also mixed. Endorsement was not shown to be associated with better  
88 reporting for items related to confounding, regardless of strength [12].

89 Several field-specific extensions to STROBE have been designed in recent years in an  
90 effort to promote complete reporting, provide more nuanced guidance for authors, and perhaps  
91 address editor's concerns that STROBE is not focused enough for their journal. Extensions for

1  
2  
3 92 other reporting guidelines are common, however the creation of extensions for STROBE seems  
4  
5  
6 93 to outpace those for other reporting guidelines such as the CONSORT [13]. Since the publication  
7  
8 94 of STROBE in 2007, 13 extensions have been published and indexed by the Enhancing the  
9  
10 95 QUALity and Transparency Of health Research (EQUATOR) Network, an international  
11  
12 96 collaboration that promotes transparent and accurate reporting and indexes reporting guidelines  
13  
14 97 [14]. In contrast, CONSORT was first published in 1996, updated in 2001 and further revised in  
15  
16 98 2010, yet only 17 extensions have been published during that period [15]. The reason behind the  
17  
18 99 difference in the pacing of publications of extensions is unclear. Perhaps the concept of field-  
19  
20 100 specific extensions to reporting guidelines were pioneered by CONSORT, thus making the idea  
21  
22 101 more commonplace for subsequent reporting guidelines. Alternatively, the complexity of the  
23  
24 102 types of observational research studies may require more guidance due to the wide variety of  
25  
26 103 methods employed in observational studies. Regardless of the reasoning, it is evident that authors  
27  
28 104 are still perceiving a need to provide more guidance on how to report information about their  
29  
30 105 studies. However, until now, many of these initiatives have not been evaluated.  
31  
32  
33  
34  
35  
36

37 106 Extensions to STROBE offer a potential new avenue for promoting more complete  
38  
39 107 reporting but their use has been largely unassessed and, similar to STROBE, they may face  
40  
41 108 implementation and usage problems [3,7]. An evaluation of the content of the extensions can  
42  
43 109 identify both strengths and weaknesses in the original STROBE guidelines and can reduce waste  
44  
45 110 in the process of extension creation. Currently, it is unclear if and how journals are encouraging  
46  
47 111 or requiring authors to use STROBE extensions. As journals are key players influencing the use  
48  
49 112 and uptake of extensions, the prevalence and typology of extension endorsement is needed to  
50  
51 113 understand the variety of methods employed to encourage transparent reporting. Data collected  
52  
53  
54  
55  
56  
57  
58  
59  
60

1  
2  
3 114 from this study can later be used as the groundwork for an evaluation of the impact of  
4  
5  
6 115 endorsement on the completeness of reporting.  
7

## 8 9 116 **Aims**

10  
11 117 The objectives of this study are twofold. Firstly, to qualitatively assess and classify the  
12  
13  
14 118 changes made in the extensions to help to identify the strengths and weaknesses of the original  
15  
16 119 STROBE checklist; this will identify potential problem areas or deficiencies conveyed in  
17  
18  
19 120 extension additions. Secondly, we will estimate the prevalence of endorsement in journals that  
20  
21 121 publish observational studies from extension-related fields and create an endorsement typology  
22  
23  
24 122 to provide a finer detailed view of the promotion of the STROBE extensions.  
25

## 26 27 123 **METHODS AND ANALYSIS**

### 28 29 30 124 **Qualitative Assessment and Analysis**

31  
32  
33 125 The main focus of this phase will be on coding the additions that are made in each  
34  
35 126 extension. Coded additions will help to identify the strengths, weaknesses and redundancies  
36  
37 127 conveyed in the STROBE extensions in order to provide guidance for modifications to the  
38  
39  
40 128 original STROBE checklist and to identify target areas for future educational interventions.  
41

42  
43 129 STROBE extensions will be identified through the EQUATOR Network website as well  
44  
45 130 as through a MEDLINE search for STROBE-related publications. Two independent reviewers  
46  
47 131 (DH, MKS) will code the additions made in each STROBE extension; disagreement will be  
48  
49  
50 132 resolved by consensus. Each sub-item on an extension that is attached to a STROBE checklist  
51  
52 133 item will be coded individually by the relevant content area (e.g., item 5 sub-item additions a, b,  
53  
54  
55 134 and c, will be counted and coded as three separate items). Each sub-item will also be coded as  
56  
57 135 “field-specific” (FS) or “not field-specific” (NFS). FS is defined as information that is  
58  
59  
60



1  
2  
3 136 particularly relevant for a single field and guidance provided cannot be generalized beyond that  
4  
5  
6 137 particular extension's field. Items which note phrases such as "including," "specifically," "for  
7  
8 138 example," and "e.g." followed by a field-specific example, generally are considered to be field-  
9  
10  
11 139 specific as these items are adding additional information specific to a certain topic area. NFS is  
12  
13 140 defined as information that reflects general epidemiological or methodological tenets and can be  
14  
15 141 extrapolated to most, if not all, types of observational research studies.  
16  
17

18 142 For the subjective assessments of the field-specific or not field-specific nature of the  
19  
20 143 additions (rated as binary yes or no), intra-class correlation (ICC) will be used to assess the inter-  
21  
22 144 rater reliability (IRR). The ICC for the two raters will be calculated for ratings across all 13  
23  
24 145 extensions that involve the subjective assessment of an item as field-specific or not. This method  
25  
26 146 was chosen because ICC does not take an all-or-nothing approach to agreement but rather it  
27  
28 147 "incorporates the magnitude of disagreement to compute IRR estimates" [16]. Descriptive  
29  
30 148 statistics such as counts, means, and percentages will be given.  
31  
32  
33  
34

## 35 149 **Endorsement Survey**

### 36 37 38 150 Eligibility Criteria

39  
40  
41 151 Extensions to the STROBE guidelines will be identified through the EQUATOR  
42  
43 152 Network website as well as through a search on PubMed. Extensions will be eligible for  
44  
45 153 assessment if at least one year has passed since publication as this allows for some time for  
46  
47 154 endorsement and implementation. In the case of multiple publications of an extension, the  
48  
49 155 earliest publication/availability date will be used to determine eligibility. As of March 1, 2017,  
50  
51 156 eligible extensions are detailed in Table 1 while ineligible extensions are detailed in Table 2.  
52  
53  
54  
55

### 56 157 **Table 1. Extensions Eligible for Assessment**

| Abbreviation       | Title/Description                                                                                           | Publication Date  |
|--------------------|-------------------------------------------------------------------------------------------------------------|-------------------|
| STREGA [4]         | STrengthening the REporting of Genetic Association Studies                                                  | February 3, 2009  |
| STROBE-EULAR [17]* | A EULAR extension of STROBE guidelines                                                                      | June 4, 2010      |
| STROBE-ME [18]     | STrengthening the Reporting of OBServational studies in Epidemiology - Molecular Epidemiology               | October 24, 2011  |
| STROME-ID [19]     | Strengthening the Reporting of Molecular Epidemiology for Infectious Diseases                               | March 13, 2014    |
| STROBE-RDS [20]    | Strengthening the Reporting of Observational Studies in Epidemiology for Respondent-Driven Sampling studies | May 1, 2015       |
| RECORD [21]        | REporting of studies Conducted using Observational Routinely-collected health Data (RECORD) Statement       | October 6, 2015   |
| STROBE-AMS [22]    | Strengthening the Reporting of Observational Studies in Epidemiology for AntiMicrobial Stewardship          | February 19, 2016 |

\* This extension does not have an official acronym. For simplicity's sake, this will be used.

**Table 2.** Extensions Not Eligible for Assessment

| Abbreviation    | Title/Description                                                                                  | Publication Date   |
|-----------------|----------------------------------------------------------------------------------------------------|--------------------|
| MARE-S [23]     | Medical Abortion Reporting of Efficacy - STROBE                                                    | April 23, 2016     |
| STROBE-NUT [24] | Strengthening the Reporting of Observational Studies in Epidemiology-NUTritional epidemiology      | June 7, 2016       |
| ROSES-I [25]    | CONSISE statement on the REporting of SEroepidemiologic Studies for influenza                      | July 17, 2016      |
| STROBE-SBR [26] | Strengthening the Reporting of Observational Studies in Epidemiology for Simulation-Based Research | July 26, 2016      |
| STROBE-NI [27]  | Strengthening the Reporting of Observational Studies in Epidemiology for Newborn Infection         | September 13, 2016 |
| STROBE-Vet [28] | Strengthening the Reporting of Observational Studies in Epidemiology - Veterinary                  | November 1, 2016   |

## Identification of Journals

Journals in fields related to extensions will be identified using the National Library of Medicine (NLM) Catalog which contains, among other things, “biomedical and health-related life sciences journals” indexed in MEDLINE. As of March 2017, there are over 5,600 journals indexed [29]. This database was chosen for two primary reasons: 1) Broad Subject Terms are

1  
2  
3 167 used which allows for easy identification and segmentation of research fields for journals and  
4  
5 168 topic areas for articles; and 2) the segmentation of other search engines, namely Clarivate  
6  
7  
8 169 Analytics Web of Science Journal List [30], did not clearly align with extension fields and would  
9  
10 170 result in more overwhelming searches with less certainty that potentially eligible journals would  
11  
12  
13 171 be identified.

14  
15 172 Journals will be identified using the following search string in the NLM Catalog:  
16  
17  
18 173 *pubmed["Broad subject terms"]*. If an extension reports search terms in their publication, these  
19  
20 174 will be considered as a starting point. All search strategies were developed in collaboration with  
21  
22 175 a medical librarian. Further details listing the individual broad subject terms used for each  
23  
24 176 extension are detailed in Table 3.

25  
26  
27 177 **Table 3.** Broad Subject Terms

| STROBE Extension | Broad Subject Term(s)                     |
|------------------|-------------------------------------------|
| STREGA           | Genetics, Genetics, Medical               |
| STROBE-EULAR     | Rheumatology                              |
| STROBE-ME        | Molecular Biology                         |
| STROME-ID        | Molecular Biology, Anti-Infective Agents  |
| STROBE-RDS       | Public Health                             |
| RECORD           | Health Services, Health Services Research |
| STROBE-AMS       | Anti-Infective Agents, Drug Therapy       |

28  
29  
30  
31  
32  
33  
34  
35  
36  
37  
38  
39  
40 178  
41  
42 179 Screening

43  
44  
45 180 Journals will be manually screened to confirm that they publish in English, are in a  
46  
47 181 relevant format (e.g., not a textbook, magazine, etc.), and are currently publishing. From the  
48  
49 182 remaining list of journals that are indexed in MEDLINE, search strategies will be used to  
50  
51  
52 183 identify observational studies in the relevant topic areas (see Supplementary File 1). The filter  
53  
54 184 for observational studies is a combination of a study design search filter for cohort and case-  
55  
56 185 control studies by BMJ Evidence Centre information specialists, Fraser et al.'s work on  
57  
58  
59  
60

1  
2  
3 186 identifying observational studies in surgical interventions, and consultations with a medical  
4  
5  
6 187 librarian [31,32].  
7

8 188 From the remaining list of journals that publish observational studies, field-specific  
9  
10 189 search strategies (detailed in Supplementary File 1) will be used. Extensions were used as a  
11  
12 190 starting point and extant systematic reviews provided additional guidance, particularly for  
13  
14 191 RECORD and STROBE-AMS [33,34]. In the case of EULAR, a combination approach will not  
15  
16 192 be used as this is the only extension where the broad subject term is the exact focus of the  
17  
18 193 extension; the search strategy for observational studies will still be used.  
19  
20  
21

22 194 The results of the OVID MEDLINE field-specific and observational search strategies will  
23  
24 195 be compared to the list of journals that the search was run on to determine inclusion and  
25  
26 196 exclusion. This combination approach will be used for several reasons. Firstly, journal  
27  
28 197 information from NLM is given in more structured manner and allows for easy matching  
29  
30 198 between sets with overlapping Broad Subject Terms. For example, both STROBE-AMS and  
31  
32 199 STROME-ID use the term “Anti-Infective Agents” while both STROBE-ME and STROME-ID  
33  
34 200 use “Molecular Biology.” This approach is also less resource-intensive and allows us to more  
35  
36 201 easily identify how many journals in each field publish observational studies, thus establishing  
37  
38 202 the extent and importance of the issue.  
39  
40  
41  
42  
43  
44  
45

#### 46 204 Data Extraction 47

48 205 Eligible journals and their websites will be searched exhaustively for any mention of  
49  
50 206 STROBE extensions in their instructions for authors, guidelines for reviewers, other guidance  
51  
52 207 documents, or ethical policies. Primary data sources (i.e., website pages) will be downloaded in  
53  
54 208 pdf format and relevant text describing guideline endorsement will be extracted and coded into a  
55  
56  
57  
58  
59  
60

1  
2  
3 209 standard data extraction sheet in Excel. Although STROBE and its extensions are the main focus  
4  
5  
6 210 of this investigation, we will also collect information about endorsement of other common  
7  
8 211 guidelines such as CONSORT, PRISMA, ICMJE's Recommendations for the Conduct,  
9  
10 212 Reporting, Editing, and Publication of Scholarly work in Medical Journals and mentions of  
11  
12 213 organizations like EQUATOR and COPE [13,15,35–37]. This information will be gathered to  
14  
15 214 see if journals that endorse other reporting guidelines or ethical reporting guidance, are more  
16  
17 215 likely to endorse STROBE or an extension. Altman and Hopewell's classification schema will be  
18  
19  
20 216 used as a starting point for the development of a typology of endorsement for STROBE and  
21  
22 217 extensions [6,38,39]. In addition to information regarding support for STROBE and its  
23  
24 218 extensions, general information about the journal such as impact factor, publisher, and contact  
25  
26  
27 219 information for the editorial offices will be collected. For the purposes of future analyses focused  
28  
29 220 on completeness of reporting, it will also be noted if journals have recently launched and have  
30  
31 221 not been publishing for at least two years prior to the publication of its related extension; this  
32  
33  
34 222 will ensure the ability to establish baseline data on the completeness of reporting. For example,  
35  
36 223 STREGA was published in 2009, therefore journals must have begun publishing by 2007 to be  
37  
38 224 included in latter assessments.

40  
41 225 As publishers often provide additional resources for authors, we will collect information  
42  
43 226 from the websites of publishers about their methods of endorsement. Endorsement from  
44  
45  
46 227 publishers will be considered to be indirect methods of support as they require significant effort  
47  
48 228 on the part of the user seeking the information. Information communicated directly through the  
49  
50 229 journal's website will be considered to be direct if it is supplied in immediately available  
51  
52  
53 230 resources to authors.

54  
55  
56 231  
57  
58  
59  
60

1  
2  
3 232 Statistical Analyses  
4

5  
6 233 Endorsement, types of endorsement, and journal characteristics (e.g. Impact factor,  
7  
8 234 publisher) will be expressed using descriptive statistics such as counts, means/medians, and  
9  
10 235 percentages. For analyses comparing two binary variables (i.e., endorsement of extensions and  
11  
12 236 endorsement of other reporting guidelines), unadjusted odds ratios and their associated 95%  
13  
14 237 confidence intervals will be conducted. Differences in impact factors between endorsing and  
15  
16 238 non-endorsing journals will be assessed with the Wilcoxon test of ranks, equivalent to the c-stat,  
17  
18 239 c-index or area under the receiver operating characteristic (ROC) curve. All confidence intervals  
19  
20 240 will be provided at the two-sided 95% level.  
21  
22  
23  
24

25 241

26  
27 242 **DISCUSSION**  
28

29 243 An evaluation of the extensions provides a deeper understanding of content areas that are  
30  
31 244 adequately detailed or in need of elaboration. By identifying the content areas that authors have  
32  
33 245 difficulties with, the groundwork will be laid for an assessment into how authors currently use  
34  
35 246 and understand STROBE and what difficulties they encounter with its implementation.  
36  
37

38 247 Results from this study will also provide estimates of the frequency and typology of  
39  
40 248 endorsement. This dataset will allow journals to be targeted in order to promote guideline usage  
41  
42 249 and will establish a groundwork for follow-up studies on attitudes related to endorsement of  
43  
44 250 STROBE and its extensions. Perhaps most importantly, this study will provide the foundation for  
45  
46 251 assessing the impact that endorsement has on the completeness of reporting. The data collected  
47  
48 252 through this study will generate important insights for the design of future studies such as  
49  
50 253 feasibility or pilot studies to estimate the effects of endorsement. Perceived lack of tangible  
51  
52 254 benefit due to a weak evidence-base can be a major barrier to guideline use. Testing a  
53  
54 255 relationship between endorsement and an increase in completeness of reporting, can provide the  
55  
56  
57  
58  
59  
60

1  
2  
3 256 much-needed data to address skeptic's concerns about the tangible value of supporting STROBE  
4  
5  
6 257 and its extensions.  
7

8 258 This study will solidify the scope of the problem of insufficient support and use of  
9  
10 259 STROBE extensions, detail variability in endorsement typology, and establish data for future  
11  
12 260 studies focused on the effects of endorsement on completeness of reporting and attitudes towards  
13  
14  
15 261 STROBE and its extensions.  
16  
17  
18  
19  
20  
21  
22  
23  
24  
25  
26  
27  
28  
29  
30  
31  
32  
33  
34  
35  
36  
37  
38  
39  
40  
41  
42  
43  
44  
45  
46  
47  
48  
49  
50  
51  
52  
53  
54  
55  
56  
57  
58  
59  
60

1  
2  
3 262 **SUPPLEMENTARY INFORMATION**

4 263 **Ethics and dissemination**

5  
6 264 Ethical approval was not needed for this study as there will be no human participants in this  
7 265 study. All data is publicly available.

8 266  
9 267 **Authors' contributions**

10 268 All authors have made substantive intellectual contributions to the development of this protocol.  
11 269 MKS conceptualized the study and led the writing of the manuscript. DH led the supervision of  
12 270 the manuscript preparation. MKS and AU developed the search strategies. All authors provided  
13 271 detailed comments on earlier drafts and approved the final manuscript.  
14 272

15 273 **Funding statement**

16  
17 274 This work was supported by the European Union's Horizon 2020 research and innovation  
18 275 programme under the Marie Skłodowska-Curie grant agreement No 676207.

19 276  
20 277 **Competing interests statement**

21 278 The authors declare that they have no competing interests.  
22 279

23 280 **Data sharing statement**

24 281 The final datasets supporting the conclusions of the research proposed in this protocol will be  
25 282 available in the Zenodo repository in the Methods in Research on Research (MiRoR) community  
26 283 [<https://zenodo.org/communities/mirror/>]. This study has been pre-registered at the Open Science  
27 284 Framework ([osf.io/u75gb](https://osf.io/u75gb)).  
28 285

29 286 **Acknowledgements**

30 287 The authors would like to acknowledge the Methods in Research on Research (MiRoR)  
31 288 consortium for their support and guidance  
32 289

33 290 **Supporting information**

34 291 **Supplementary File 1.** Ovid MEDLINE Search Strategies  
35 292  
36 293  
37 294  
38 295  
39 296  
40 297  
41 298  
42 299  
43 300  
44 301  
45 302  
46  
47  
48  
49  
50  
51  
52  
53  
54  
55  
56  
57  
58  
59  
60



## 303 REFERENCES

- 304 1 Vandenbroucke JP, von Elm E, Altman DG, *et al.* Strengthening the Reporting of  
305 Observational Studies in Epidemiology (STROBE): Explanation and Elaboration.  
306 *Epidemiology* 2007;**18**:805–35. doi:10.1097/EDE.0b013e3181577511
- 307 2 ICMJE | Recommendations | Defining the Role of Authors and Contributors.  
308 [http://www.icmje.org/recommendations/browse/roles-and-responsibilities/defining-the-role-](http://www.icmje.org/recommendations/browse/roles-and-responsibilities/defining-the-role-of-authors-and-contributors.html)  
309 [of-authors-and-contributors.html](http://www.icmje.org/recommendations/browse/roles-and-responsibilities/defining-the-role-of-authors-and-contributors.html) (accessed 7 Dec 2016).
- 310 3 Hirst A, Altman DG. Are Peer Reviewers Encouraged to Use Reporting Guidelines? A  
311 Survey of 116 Health Research Journals. *PLOS ONE* 2012;**7**:e35621.  
312 doi:10.1371/journal.pone.0035621
- 313 4 Nedovic D, Panic N, Pastorino R, *et al.* Evaluation of the Endorsement of the STrengthening  
314 the REporting of Genetic Association Studies (STREGA) Statement on the Reporting  
315 Quality of Published Genetic Association Studies. *J Epidemiol* 2016;**26**, **26**:399, 399–404.  
316 doi:10.2188/jea.JE20150173
- 317 5 Stevens A, Shamseer L, Weinstein E, *et al.* Relation of completeness of reporting of health  
318 research to journals' endorsement of reporting guidelines: systematic review. *BMJ*  
319 2014;**348**:g3804. doi:10.1136/bmj.g3804
- 320 6 Hopewell S, Ravaud P, Baron G, *et al.* Effect of editors' implementation of CONSORT  
321 guidelines on the reporting of abstracts in high impact medical journals: interrupted time  
322 series analysis. *BMJ* 2012;**344**:e4178.
- 323 7 Grindlay DJ, Dean RS, Christopher MM, *et al.* A survey of the awareness, knowledge,  
324 policies and views of veterinary journal Editors-in-Chief on reporting guidelines for  
325 publication of research. *BMC Vet Res* 2014;**10**, **10**:10, 10–10. doi:10.1186/1746-6148-10-10,  
326 10.1186/1746-6148-10-10
- 327 8 Cobo E, Cortés J, Ribera JM, *et al.* Effect of using reporting guidelines during peer review  
328 on quality of final manuscripts submitted to a biomedical journal: masked randomised trial.  
329 *BMJ* 2011;**343**:d6783. doi:10.1136/bmj.d6783
- 330 9 Johansen M, Thomsen SF. Guidelines for Reporting Medical Research: A Critical Appraisal.  
331 *Int Sch Res Not* 2016;**2016**. doi:10.1155/2016/1346026
- 332 10 Hua F, Walsh T, Glenny A-M, *et al.* Surveys on Reporting Guideline Usage in Dental  
333 Journals. *J Dent Res* 2016;**95**:1207–13. doi:10.1177/0022034516657803
- 334 11 Kunath F, Grobe HR, Rücker G, *et al.* Do Journals Publishing in the Field of Urology  
335 Endorse Reporting Guidelines? A Survey of Author Instructions. *Urol Int* 2011;**88**:54–9.  
336 doi:10.1159/000332742
- 337 12 Pouwels KB, Widyakusuma NN, Groenwold RH, *et al.* Quality of reporting of confounding  
338 remained suboptimal after the STROBE guideline. *J Clin Epidemiol* 2016;**69**:217–24.  
339 doi:/10.1016/j.jclinepi.2015.08.009

- 1  
2  
3 340 13 Schulz KF, Altman DG, Moher D, *et al.* CONSORT 2010 statement: updated guidelines for  
4 341 reporting parallel group randomised trials. *PLoS Med* 2010;**7**:e1000251.  
5 342 doi:10.1371/journal.pmed.1000251  
6  
7  
8 343 14 The EQUATOR Network. Reporting guidelines | The EQUATOR Network.  
9 344 [http://www.equator-](http://www.equator-network.org/?post_type=eq_guidelines&eq_guidelines_study_design=0&eq_guidelines_clinical_specialty=0&eq_guidelines_report_section=0&s=+STROBE+extension&btn_submit=Search+Reporting+Guidelines)  
10 345 [network.org/?post\\_type=eq\\_guidelines&eq\\_guidelines\\_study\\_design=0&eq\\_guidelines\\_clinical\\_specialty=0&eq\\_guidelines\\_report\\_section=0&s=+STROBE+extension&btn\\_submit=Search+Reporting+Guidelines](http://www.equator-network.org/?post_type=eq_guidelines&eq_guidelines_study_design=0&eq_guidelines_clinical_specialty=0&eq_guidelines_report_section=0&s=+STROBE+extension&btn_submit=Search+Reporting+Guidelines) (accessed 16 Mar 2017).  
11 346  
12 347  
13  
14  
15 348 15 The EQUATOR Network. Reporting guidelines | The EQUATOR Network.  
16 349 [http://www.equator-](http://www.equator-network.org/?post_type=eq_guidelines&eq_guidelines_study_design=0&eq_guidelines_clinical_specialty=0&eq_guidelines_report_section=0&s=+CONSORT+extension&btn_submit=Search+Reporting+Guidelines)  
17 350 [network.org/?post\\_type=eq\\_guidelines&eq\\_guidelines\\_study\\_design=0&eq\\_guidelines\\_clinical\\_specialty=0&eq\\_guidelines\\_report\\_section=0&s=+CONSORT+extension&btn\\_submit=Search+Reporting+Guidelines](http://www.equator-network.org/?post_type=eq_guidelines&eq_guidelines_study_design=0&eq_guidelines_clinical_specialty=0&eq_guidelines_report_section=0&s=+CONSORT+extension&btn_submit=Search+Reporting+Guidelines) (accessed 16 Mar 2017).  
18 351  
19 352  
20  
21  
22 353 16 Hallgren KA. Computing Inter-Rater Reliability for Observational Data: An Overview and  
23 354 Tutorial. *Tutor Quant Methods Psychol* 2012;**8**:23–34.  
24  
25 355 17 Dixon WG, Carmona L, Finckh A, *et al.* EULAR points to consider when establishing,  
26 356 analysing and reporting safety data of biologics registers in rheumatology. *Ann Rheum Dis*  
27 357 2010;**69**:1596. doi: 10.1136/ard.2009.125526  
28  
29  
30 358 18 Gallo V, Egger M, McCormack V, *et al.* Strengthening the Reporting of OBservational  
31 359 studies in Epidemiology – Molecular Epidemiology (STROBE-ME): An extension of the  
32 360 STROBE statement. *Eur J Clin Invest* 2012;**42**:1–16. doi:10.1111/j.1365-2362.2011.02561.x  
33  
34 361 19 Field N, Cohen T, Struelens MJ, *et al.* Strengthening the Reporting of Molecular  
35 362 Epidemiology for Infectious Diseases (STROME-ID): an extension of the STROBE  
36 363 statement. *Lancet Infect Dis* 2014;**14**:341–52. doi:10.1016/S1473-3099(13)70324-4  
37  
38  
39 364 20 White RG, Hakim AJ, Salganik MJ, *et al.* Strengthening the Reporting of Observational  
40 365 Studies in Epidemiology for respondent-driven sampling studies: “STROBE-RDS”  
41 366 statement. *J Clin Epidemiol* 2015;**68**:1463–71. doi:10.1016/j.jclinepi.2015.04.002  
42  
43 367 21 Benchimol EI, Smeeth L, Guttman A, *et al.* The REporting of studies Conducted using  
44 368 Observational Routinely-collected health Data (RECORD) Statement. *PLoS Med*  
45 369 2015;**12**:e1001885. doi:10.1371/journal.pmed.1001885  
46  
47  
48 370 22 Tacconelli E, Cataldo MA, Paul M, *et al.* STROBE-AMS: recommendations to optimise  
49 371 reporting of epidemiological studies on antimicrobial resistance and informing improvement  
50 372 in antimicrobial stewardship. *BMJ Open* 2016;**6**:e010134. doi:10.1136/bmjopen-2015-  
51 373 010134  
52  
53  
54 374 23 Creinin MD, Chen MJ. Medical abortion reporting of efficacy: the MARE guidelines.  
55 375 *Contraception* 2016;**94**:97–103. doi:10.1016/j.contraception.2016.04.013  
56  
57  
58  
59  
60

- 1  
2  
3 376 24 Lachat C, Hawwash D, Ocké MC, *et al.* Strengthening the Reporting of Observational  
4 377 Studies in Epidemiology—Nutritional Epidemiology (STROBE-nut): An Extension of the  
5 378 STROBE Statement. *PLOS Med* 2016;**13**:e1002036. doi:10.1371/journal.pmed.1002036  
6  
7  
8 379 25 Horby PW, Laurie KL, Cowling BJ, *et al.* CONSISE statement on the reporting of  
9 380 Seroepidemiologic Studies for influenza (ROSES-I statement): an extension of the STROBE  
10 381 statement. *Influenza Other Respir Viruses* 2017;**11**:2–14. doi:10.1111/irv.12411  
11  
12 382 26 Cheng A, Kessler D, Mackinnon R, *et al.* Reporting guidelines for health care simulation  
13 383 research: extensions to the CONSORT and STROBE statements. *Adv Simul* 2016;**1**:25.  
14 384 doi:10.1186/s41077-016-0025-y  
15  
16  
17 385 27 Fitchett EJA, Seale AC, Vergnano S, *et al.* Strengthening the Reporting of Observational  
18 386 Studies in Epidemiology for Newborn Infection (STROBE-NI): an extension of the  
19 387 STROBE statement for neonatal infection research. *Lancet Infect Dis* 2016;**16**:e202–13.  
20 388 doi:10.1016/S1473-3099(16)30082-2  
21  
22  
23 389 28 Sargeant J m., O'Connor A m., Dohoo I r., *et al.* Methods and Processes of Developing the  
24 390 Strengthening the Reporting of Observational Studies in Epidemiology – Veterinary  
25 391 (STROBE-Vet) Statement. *J Vet Intern Med* 2016;**30**:1887–95. doi:10.1111/jvim.14574  
26  
27 392 29 currentlyindexed - NLM Catalog - NCBI.  
28 393 <https://www.ncbi.nlm.nih.gov/nlmcatalog/?term=currentyindexed> (accessed 8 Mar 2017).  
29  
30  
31 394 30 Master Journal List - Clarivate Analytics. <http://ip-science.thomsonreuters.com/mjl/>  
32 395 (accessed 17 Mar 2017).  
33  
34 396 31 Fraser C, Murray A, Burr J. Identifying observational studies of surgical interventions in  
35 397 MEDLINE and EMBASE. *BMC Med Res Methodol* 2006;**6**:41. doi:10.1186/1471-2288-6-41  
36  
37 398 32 Study design search filters.  
38 399 <http://clinicalevidence.bmj.com/x/set/static/ebm/learn/665076.html> (accessed 22 Jun 2017).  
39  
40  
41 400 33 Raftery J, Roderick P, Stevens A. Potential use of routine databases in health technology  
42 401 assessment. *Health Technol Assess Winch Engl* 2005;**9**:1–92, iii–iv.  
43  
44 402 34 Filice G, Drekonja D, Greer N, *et al.* *Antimicrobial Stewardship Programs in Inpatient*  
45 403 *Settings: A Systematic Review*. Washington (DC): Department of Veterans Affairs (US)  
46 404 2013. <http://www.ncbi.nlm.nih.gov/books/NBK253513/> (accessed 3 May 2017).  
47  
48  
49 405 35 Moher D, Liberati A, Tetzlaff J, *et al.* Preferred Reporting Items for Systematic Reviews and  
50 406 Meta-Analyses: The PRISMA Statement. *PLOS Med* 2009;**6**:e1000097.  
51 407 doi:10.1371/journal.pmed.1000097  
52  
53 408 36 ICMJE | Recommendations. <http://www.icmje.org/recommendations/> (accessed 1 May  
54 409 2017).  
55  
56  
57  
58  
59  
60

- 1  
2  
3 410 37 Committee on Publication Ethics: COPE | Promoting integrity in research publication.  
4 411 <https://publicationethics.org/> (accessed 1 May 2017).  
5  
6  
7 412 38 Altman DG. Endorsement of the CONSORT statement by high impact medical journals:  
8 413 survey of instructions for authors. *BMJ* 2005;**330**:1056–7. doi:10.1136/bmj.330.7499.1056  
9  
10 414 39 Hopewell S, Altman DG, Moher D, *et al.* Endorsement of the CONSORT Statement by high  
11 415 impact factor medical journals: a survey of journal editors and journal “Instructions to  
12 416 Authors.” *Trials* 2008;**9**:20. doi:10.1186/1745-6215-9-20

14  
15 417  
16  
17  
18  
19  
20  
21  
22  
23  
24  
25  
26  
27  
28  
29  
30  
31  
32  
33  
34  
35  
36  
37  
38  
39  
40  
41  
42  
43  
44  
45  
46  
47  
48  
49  
50  
51  
52  
53  
54  
55  
56  
57  
58  
59  
60

For peer review only

1  
2  
3 **Supplementary File 1. Ovid MEDLINE Search Strategies**  
4

5  
6 All searches use the following database:

7 Database: Ovid MEDLINE(R) Epub Ahead of Print, In-Process & Other Non-Indexed Citations,  
8 Ovid MEDLINE(R) Daily and Ovid MEDLINE(R) <1946 to Present>  
9

10 For each extension (except for EULAR), the observational strategy (14) is combined with the  
11 field-specific strategy (or/15-xx) and restricted to search only within the list of eligible journals  
12 (“journal name” or “journal name 2” ...or “journal name n”...),jn. within a certain time frame  
13 (limit xx to year=”2 years prior to extension publication – 2017”).  
14

15  
16 *Identifying Observational Studies*  
17

- 18 1. Observational study/  
19 2. (observational adj3 stud\$.tw.  
20 3. exp Cohort Studies/  
21 4. cohort\$.tw.  
22 5. controlled clinical trial.pt.  
23 6. Epidemiologic Methods/  
24 7. exp case-control studies/  
25 8. (case\$ adj3 control\$.tw.  
26 9. Comparative Study/  
27 10. prospective\$.tw.  
28 11. retrospective\$.tw.  
29 12. Cross-Sectional Studies/  
30 13. prevalence/  
31 14. or/1-13  
32  
33  
34

35 *Identifying Journal Publishing Studies in the Relevant Field*  
36

37 STREGA

- 38 15. exp Genetic Association Studies/  
39 16. exp Polymorphism, Genetic/  
40 17. exp Genetic Predisposition to Disease/  
41 18. exp Genetic Research/  
42 19. genome-wide association.tw.  
43 20. genomewide association.tw  
44 21. genetic research.tw.  
45 22. gene\$ polymorphism.tw.  
46 23. gene\$ association.tw.  
47 24. or/15-23  
48  
49

50 STROBE-EULAR

51 No field-specific search strategy necessary due to specificity of broad subject term. The  
52 observational filter is still used in combination with the eligible journal pool.  
53  
54

55 STROBE-ME

- 56 15. exp molecular epidemiology/  
57  
58  
59  
60

- 1  
2  
3 47 16. exp Biomarkers/  
4 48 17. Molecular epidemiolog\$.tw.  
5 49 18. Genetic epidemiolog\$.tw.  
6 50 19. Biomarker\$.tw.  
7 51 20. Bio-marker\$.tw.  
8 52 21. Or/15-20  
9 53  
10 54 STROME-ID  
11 55 15. Molecular Epidemiology/  
12 56 16. molecular epidemiolog\$.tw.  
13 57 17. exp Communicable Diseases/ep [Epidemiology]  
14 58 18. exp Infection Control/  
15 59 19. infection\$.tw.  
16 60 20. exp Molecular Typing/  
17 61 21. molecular typing.tw.  
18 62 22. molecular marker\$.tw.  
19 63 23. molecular clock.tw.  
20 64 24. multiple-strain.tw.  
21 65 25. or/15-24  
22 66  
23 67 RECORD  
24 68 15. exp Records as Topic/  
25 69 16. Registries/  
26 70 17. database/ or dataset/  
27 71 18. exp Information Systems/  
28 72 19. (data or dataset or database or register or registry or registries or record\$.tw.  
29 73 20. or/15-19  
30 74  
31 75 STROBE-RDS  
32 76 15. respondent driven.tw.  
33 77 16. respondentdriven.tw.  
34 78 17. participant driven.tw.  
35 79 18. or/15-17  
36 80  
37 81 STROBE-AMS  
38 82 15. exp Anti-Infective Agents/  
39 83 16. exp Infection/  
40 84 17. (antibiot\$ or antimicrob\$.tw.  
41 85 18. exp Drug Resistance, Microbial/  
42 86 19. Vancomycin/  
43 87 20. exp Aminoglycosides/  
44 88 21. exp Fluoroquinolones/  
45 89 22. exp Carbapenems/  
46 90 23. exp Cephalosporins/  
47 91 24. (vancomycin or aminoglycosides or fluoroquinolones or carbapenems or cephalosporins).tw.  
48 92 25. or/15-24  
49  
50  
51  
52  
53  
54  
55  
56  
57  
58  
59  
60

# BMJ Open

## The STROBE extensions: A protocol for a qualitative assessment of content and a survey of endorsement

|                                 |                                                                                                                                                                                                                                                                                                                                                                                                                                                                                                                                                                                                                                                                              |
|---------------------------------|------------------------------------------------------------------------------------------------------------------------------------------------------------------------------------------------------------------------------------------------------------------------------------------------------------------------------------------------------------------------------------------------------------------------------------------------------------------------------------------------------------------------------------------------------------------------------------------------------------------------------------------------------------------------------|
| Journal:                        | <i>BMJ Open</i>                                                                                                                                                                                                                                                                                                                                                                                                                                                                                                                                                                                                                                                              |
| Manuscript ID                   | bmjopen-2017-019043.R1                                                                                                                                                                                                                                                                                                                                                                                                                                                                                                                                                                                                                                                       |
| Article Type:                   | Protocol                                                                                                                                                                                                                                                                                                                                                                                                                                                                                                                                                                                                                                                                     |
| Date Submitted by the Author:   | 12-Sep-2017                                                                                                                                                                                                                                                                                                                                                                                                                                                                                                                                                                                                                                                                  |
| Complete List of Authors:       | Sharp, Melissa K; Universite Paris Descartes, Pierre Louis Doctoral School: Epidemiology and Biomedical Sciences; Sveuciliste u Splitu, Department of Psychology, Faculty of Humanities and Social Sciences<br>Utrobičić, Ana; Sveuciliste u Splitu, School of Medicine<br>Gómez, Guadalupe; Universitat Politecnica de Catalunya, Departament d'Estadística i Investigació Operativa<br>Cobo, Erik; Universitat Politecnica Catalunya, Departament d'Estadística i Investigació Operativa<br>Wager, Elizabeth; Sideview; Sveuciliste u Splitu, School of Medicine<br>Hren, Darko; Sveuciliste u Splitu, Department of Psychology, Faculty of Humanities and Social Sciences |
| <b>Primary Subject Heading</b>: | Medical publishing and peer review                                                                                                                                                                                                                                                                                                                                                                                                                                                                                                                                                                                                                                           |
| Secondary Subject Heading:      | Research methods                                                                                                                                                                                                                                                                                                                                                                                                                                                                                                                                                                                                                                                             |
| Keywords:                       | Reporting Guidelines, STROBE, observational studies, information dissemination/methods, bibliometrics                                                                                                                                                                                                                                                                                                                                                                                                                                                                                                                                                                        |
|                                 |                                                                                                                                                                                                                                                                                                                                                                                                                                                                                                                                                                                                                                                                              |

SCHOLARONE™  
Manuscripts

only



1  
2  
3  
4 1  
5 2  
6  
7 3  
8  
9 4 The STROBE extensions: A protocol for a qualitative assessment of content and a survey of  
10 5 endorsement  
11  
12 6

13  
14 7 Melissa K. Sharp<sup>1,2</sup>, Ana Utrobičić<sup>3</sup>, Guadalupe Gómez<sup>4</sup>, Erik Cobo<sup>4</sup>, Elizabeth Wager<sup>5,3</sup>, Darko  
15 8 Hren<sup>1</sup>  
16  
17 9

18  
19 10 <sup>1</sup> University of Split, Department of Psychology, Faculty of Humanities and Social Sciences,  
20 11 Split, Croatia

21  
22 12 <sup>2</sup> Université Paris Descartes, Sorbonne Paris Cité, Pierre Louis Doctoral School: Epidemiology  
23 13 and Biomedical Sciences, Paris, France

24  
25 14 <sup>3</sup> University of Split, School of Medicine, Split, Croatia

26  
27 15 <sup>4</sup> Universitat Politècnica de Catalunya-BarcelonaTech, Departament d'Estadística i Investigació  
28 16 Operativa, Barcelona, Spain

29  
30 17 <sup>5</sup> Sideview, Buckinghamshire, United Kingdom  
31  
32 18

33 19  
34  
35 20  
36  
37 21 \*Corresponding author:

38  
39 22 Melissa K Sharp

40  
41 23 University of Split

42  
43 24 Livanjska ulica 5, Split, Croatia 21000

44  
45 25 Email: [msharp@unist.hr](mailto:msharp@unist.hr)

46  
47 26 Tel: +1 248 701 8109; +385 097 632 4542  
48  
49 27

50  
51 28 **Word Count:** 2642  
52  
53 29  
54  
55  
56  
57  
58  
59  
60



1  
2  
3  
4  
5  
6  
7  
8  
9  
10  
11  
12  
13  
14  
15  
16  
17  
18  
19  
20  
21  
22  
23  
24  
25  
26  
27  
28  
29  
30  
31  
32  
33  
34  
35  
36  
37  
38

## 30 Abstract

31 **Introduction:** The STrengthening the Reporting of OBservational studies in Epidemiology  
32 (STROBE) Statement was developed in response to inadequate reporting of observational  
33 studies. In recent years, several extensions to STROBE have been created to provide more  
34 nuanced field-specific guidance for authors. The content and the prevalence of extension  
35 endorsement has not yet been assessed. Accordingly, there are two aims: 1) to classify changes  
36 made in the extensions to identify strengths and weaknesses of the original STROBE checklist;  
37 and 2) to determine the prevalence and typology of endorsement by journals in fields related to  
38 extensions.

39 **Methods and analysis:** Two independent researchers will assess additions in each extension.  
40 Additions will be coded as “field-specific” (FS) or “not field-specific” (NFS). FS is defined as  
41 particularly relevant information for a single field and guidance provided generally cannot be  
42 extrapolated beyond that field. NFS is defined as information that reflects epidemiological or  
43 methodological tenets and can be generalized to most, if not all, types of observational research  
44 studies. Intra-class correlation (ICC) will be calculated to measure reviewers’ concordance.  
45 Upon disagreement, consensus will be sought. Individual additions will be grouped by STROBE  
46 checklist items to identify the frequency and distribution of changes.

47 Journals in fields related to extensions will be identified through National Library of Medicine  
48 (NLM) PubMed Broad Subject Terms, screened for eligibility, and further distilled via Ovid  
49 MEDLINE search strategies for observational studies. Text describing endorsement will be  
50 extracted from each journal’s website. A classification scheme will be created for endorsement  
51 types and the prevalence of endorsement will be estimated. Analyses will utilize NVivo 11 and  
52 SAS University Edition.

53 **Ethics and dissemination:** This study does not require ethical approval as it does not involve  
54 human participants. This study has been pre-registered on Open Science Framework.

55 **Word count:** 290

56 **Keywords:** Reporting guidelines, STROBE, observational studies, information  
57 dissemination/methods, bibliometrics

1  
2  
3 58 **Strengths and limitations of this study**  
4

- 5 59
- 6 60 • Our systematic approach to qualitatively assess the content of the additions made in the  
7 61 STROBE extensions provides a comprehensive overview of the types of changes made  
8 62 and can identify redundancies and problem areas.
  - 9 63 • Our method involves standardized search strategies in Ovid MEDLINE, designed to  
10 64 capture a representative sample and circumvent issues of subjectivity in the identification  
11 65 of eligible journals
  - 12 66 • This study will create an open source corpus of recent observational studies spanning  
13 67 seven fields which future researchers can utilize to assess completeness of reporting or  
14 68 other topics of interest.
  - 15 69 • The bibliometric aspect of this study only focuses on 7 extensions and fields so results  
16 are not generalizable to other studies.  
17  
18  
19  
20  
21  
22  
23  
24  
25  
26  
27  
28  
29  
30  
31  
32  
33  
34  
35  
36  
37  
38  
39  
40  
41  
42  
43  
44  
45  
46  
47  
48  
49  
50  
51  
52  
53  
54  
55  
56  
57  
58  
59  
60

## 70 INTRODUCTION

71 The STrengthening the Reporting of OBServational studies in Epidemiology (STROBE)  
72 Statement was developed in 2007 in response to the pervasiveness of inadequate reporting of  
73 observational studies. STROBE provides a checklist of items that serve as a reference for how to  
74 report sufficient information for observational research involving cohort, case-control, and cross-  
75 sectional studies [1]. The guidelines have been endorsed by the International Committee of  
76 Medical Journal Editors (ICMJE) and the accompanying checklist is sometimes explicitly used  
77 as a requirement for manuscript submission [2]. However, there is no standard method of  
78 endorsement by journals and little is known about the most effective ways to apply the  
79 guidelines in practice [3–5].

80 Regarding the reporting of clinical trials, requiring a completed Consolidated Standards  
81 of Reporting Trials (CONSORT) checklist upon submission of a manuscript has been shown to  
82 lead to improvements in reporting [6]. However, some journals do not want to take responsibility  
83 for guideline enforcement and many overlook non-adherence to guidelines; editors have  
84 expressed beliefs that their journal's current policies are adequate or that they fear losing authors  
85 to other journals that have less strict requirements for publication [7–9]. Editors may also be  
86 unaware of the existence of guidelines, as demonstrated by low endorsement rates by journals in  
87 dentistry [10], veterinary medicine [7], and urology [11]. On the other hand, the evidence for the  
88 endorsement of STROBE is also mixed. Endorsement was not shown to be associated with better  
89 reporting for items related to confounding, regardless of strength [12].

90 Several field-specific extensions to STROBE have been designed in recent years in an  
91 effort to promote complete reporting, provide more nuanced guidance for authors, and perhaps  
92 address editor's concerns that STROBE is not focused enough for their journal. Extensions for

1  
2  
3 93 other reporting guidelines are common, however the creation of extensions for STROBE seems  
4  
5  
6 94 to outpace those for other reporting guidelines such as the CONSORT [13]. Since the publication  
7  
8 95 of STROBE in 2007, 13 extensions have been published and indexed by the Enhancing the  
9  
10 96 QUALity and Transparency Of health Research (EQUATOR) Network, an international  
11  
12 97 collaboration that promotes transparent and accurate reporting and indexes reporting guidelines  
13  
14  
15 98 [14]. In contrast, CONSORT was first published in 1996, updated in 2001 and further revised in  
16  
17 99 2010, yet only 17 extensions have been published during that period [15]. The reason behind the  
18  
19  
20 100 difference in the pacing of publications of extensions is unclear. Perhaps the concept of field-  
21  
22 101 specific extensions to reporting guidelines were pioneered by CONSORT, thus making the idea  
23  
24 102 more commonplace for subsequent reporting guidelines. Alternatively, the complexity of the  
25  
26  
27 103 types of observational research studies may require more guidance due to the wide variety of  
28  
29 104 methods employed in observational studies. Regardless of the reasoning, it is evident that authors  
30  
31 105 are still perceiving a need to provide more guidance on how to report information about their  
32  
33  
34 106 studies. However, until now, many of these initiatives have not been evaluated.

35  
36  
37 107 Extensions to STROBE offer a potential new avenue for promoting more complete  
38  
39 108 reporting but their use has been largely unassessed and, similar to STROBE, they may face  
40  
41 109 implementation and usage problems [3,7]. Being intended as general guidelines for observational  
42  
43 110 studies, STROBE should include *necessary* information that is *sufficient* to most observational  
44  
45 111 studies. For some fields, however, STROBE guidelines may not be sufficient due to specific  
46  
47 112 requirements within the field. This gap is then covered by an extension for that field. However,  
48  
49 113 when extensions include non-specific guidance that can be extrapolated to most observational  
50  
51 114 studies (e.g. details about participants, settings, confounders, follow-up, biases or any other  
52  
53  
54 115 general epidemiological constructs), it suggests potential deficiencies in STROBE checklist. If  
55  
56  
57  
58  
59  
60

1  
2  
3 116 the content is already in STROBE, extension authors may have thought that it was not clearly  
4  
5 117 communicated, or that it is necessary to include it in the checklist instead of being only in the  
6  
7  
8 118 explanation and elaboration document. Whilst, if the content is not already in STROBE,  
9  
10 119 extension authors may have identified a gap or insufficiency which should be considered as an  
11  
12 120 addendum to STROBE. Therefore, by identifying non-specific or redundant guidance suggested  
13  
14 121 in the STROBE extensions, we will be able to identify perceived gaps and deficiencies in the  
15  
16 122 current STROBE checklist and potentially reduce future waste in the process of extension  
17  
18 123 creation.  
19  
20  
21

22  
23 124 A perceived lack of confidence in reporting guidelines can impact journal editors'  
24  
25 125 willingness to endorse reporting guidelines. Currently, it is unclear if and how journals are  
26  
27 126 encouraging or requiring authors to use STROBE extensions. As journals are key players  
28  
29 127 influencing the use and uptake of extensions, the prevalence and typology of extension  
30  
31 128 endorsement is needed to understand the variety of methods employed to encourage transparent  
32  
33 129 reporting. Data collected from this study can later be used as the groundwork for an evaluation of  
34  
35 130 the impact of endorsement on the completeness of reporting.  
36  
37  
38  
39

#### 40 131 **Aims**

41  
42  
43 132 The objectives of this study are twofold. Firstly, to qualitatively assess and classify the  
44  
45 133 changes made in the extensions to help to identify the strengths and weaknesses of the original  
46  
47 134 STROBE checklist; this will identify potential problem areas or deficiencies conveyed in  
48  
49 135 extension additions. Secondly, we will estimate the prevalence of endorsement in journals that  
50  
51 136 publish observational studies from extension-related fields and create an endorsement typology  
52  
53  
54 137 to provide a finer detailed view of the promotion of the STROBE extensions.  
55  
56  
57  
58  
59  
60

## 138 **METHODS AND ANALYSIS**

### 139 **Qualitative Assessment and Analysis**

140 The main focus of this phase will be on coding the additions that are made in each  
141 extension. Coded additions will help to identify the strengths, weaknesses and redundancies  
142 conveyed in the STROBE extensions in order to provide guidance for modifications to the  
143 original STROBE checklist and to identify target areas for future educational interventions.

144 We will assess the content of 13 STROBE extensions which were identified through the  
145 EQUATOR Network website as well as through a PubMed search for STROBE-related  
146 publications. Two independent reviewers (DH, MKS) will code the additions made in each  
147 STROBE extension; disagreement will be resolved by consensus. Each sub-item on an extension  
148 that is attached to a STROBE checklist item will be coded individually by the relevant content  
149 area (e.g., item 5 sub-item additions a, b, and c, will be counted and coded as three separate  
150 items). Each sub-item will also be coded as “field-specific” (FS) or “not field-specific” (NFS).  
151 FS is defined as information that is particularly relevant for a single field and guidance provided  
152 cannot be generalized beyond that particular extension’s field. Items which note phrases such as  
153 “including,” “specifically,” “for example,” and “e.g.” followed by a field-specific example,  
154 generally are considered to be field-specific as these items are adding additional information  
155 specific to a certain topic area. NFS is defined as information that reflects general  
156 epidemiological or methodological tenets and can be extrapolated to most, if not all, types of  
157 observational research studies.

158 For the subjective assessments of the field-specific or not field-specific nature of the  
159 additions (rated as binary yes or no), intra-class correlation (ICC) will be used to assess the inter-

1  
2  
3 160 rater reliability (IRR). The ICC for the two raters will be calculated for ratings across all 13  
4  
5 161 extensions that involve the subjective assessment of an item as field-specific or not. This method  
6  
7  
8 162 was chosen because ICC does not take an all-or-nothing approach to agreement but rather it  
9  
10 163 “incorporates the magnitude of disagreement to compute IRR estimates” [16]. Descriptive  
11  
12 164 statistics such as counts, means, and percentages will be given.

## 165 **Endorsement Survey**

### 166 Eligibility Criteria

167 Extensions to the STROBE guidelines were identified through the EQUATOR Network  
168 website as well as through a search on PubMed. Extensions are eligible for assessment if at least  
169 one year has passed since publication as this allows for some time for endorsement and  
170 implementation. In the case of multiple publications of an extension, the earliest  
171 publication/availability date will be used to determine eligibility. As of March 1, 2017, eligible  
172 extensions are detailed in Table 1 while ineligible extensions are detailed in Table 2.

173 **Table 1.** Extensions Eligible for Assessment

| Abbreviation       | Title/Description                                                                                           | Publication Date |
|--------------------|-------------------------------------------------------------------------------------------------------------|------------------|
| STREGA [4]         | STrengthening the REporting of Genetic Association Studies                                                  | February 3, 2009 |
| STROBE-EULAR [17]* | A EULAR extension of STROBE guidelines                                                                      | June 4, 2010     |
| STROBE-ME [18]     | STrengthening the Reporting of OBServational studies in Epidemiology - Molecular Epidemiology               | October 24, 2011 |
| STROME-ID [19]     | Strengthening the Reporting of Molecular Epidemiology for Infectious Diseases                               | March 13, 2014   |
| STROBE-RDS [20]    | Strengthening the Reporting of Observational Studies in Epidemiology for Respondent-Driven Sampling studies | May 1, 2015      |
| RECORD [21]        | REporting of studies Conducted using Observational Routinely-collected health Data (RECORD) Statement       | October 6, 2015  |



|                 |                                                                                                    |                   |
|-----------------|----------------------------------------------------------------------------------------------------|-------------------|
| STROBE-AMS [22] | Strengthening the Reporting of Observational Studies in Epidemiology for AntiMicrobial Stewardship | February 19, 2016 |
|-----------------|----------------------------------------------------------------------------------------------------|-------------------|

174 \* This extension does not have an official acronym. For simplicity's sake, this will be used.

175

176 **Table 2.** Extensions Not Eligible for Assessment

| Abbreviation    | Title/Description                                                                                  | Publication Date   |
|-----------------|----------------------------------------------------------------------------------------------------|--------------------|
| MARE-S [23]     | Medical Abortion Reporting of Efficacy - STROBE                                                    | April 23, 2016     |
| STROBE-NUT [24] | Strengthening the Reporting of Observational Studies in Epidemiology-NUTritional epidemiology      | June 7, 2016       |
| ROSES-I [25]    | CONSISE statement on the REporting of SEroepidemiologic Studies for influenza                      | July 17, 2016      |
| STROBE-SBR [26] | Strengthening the Reporting of Observational Studies in Epidemiology for Simulation-Based Research | July 26, 2016      |
| STROBE-NI [27]  | Strengthening the Reporting of Observational Studies in Epidemiology for Newborn Infection         | September 13, 2016 |
| STROBE-Vet [28] | Strengthening the Reporting of Observational Studies in Epidemiology – Veterinary                  | November 1, 2016   |

177

## 178 Identification of Journals

179 Journals in fields related to extensions will be identified using the National Library of  
 180 Medicine (NLM) Catalog which contains, among other things, “biomedical and health-related  
 181 life sciences journals” indexed in MEDLINE. As of March 2017, there are over 5,600 journals  
 182 indexed [29]. This database was chosen for two primary reasons: 1) Broad Subject Terms are  
 183 used which allows for easy identification and segmentation of research fields for journals and  
 184 topic areas for articles; and 2) the segmentation of other search engines, namely Clarivate  
 185 Analytics Web of Science Journal List [30], did not clearly align with extension fields and would  
 186 result in more overwhelming searches with less certainty that potentially eligible journals would  
 187 be identified.

188 Journals will be identified using the following search string in the NLM Catalog:

189 *pubmed*["Broad subject terms"]. If an extension reports search terms in their publication, these  
 190 will be considered as a starting point. All search strategies were developed in collaboration with



191 a medical librarian. Further details listing the individual broad subject terms used for each  
 192 extension are detailed in Table 3.

193 **Table 3.** Broad Subject Terms

| STROBE Extension | Broad Subject Term(s)                     |
|------------------|-------------------------------------------|
| STREGA           | Genetics, Genetics, Medical               |
| STROBE-EULAR     | Rheumatology                              |
| STROBE-ME        | Molecular Biology                         |
| STROME-ID        | Molecular Biology, Anti-Infective Agents  |
| STROBE-RDS       | Public Health                             |
| RECORD           | Health Services, Health Services Research |
| STROBE-AMS       | Anti-Infective Agents, Drug Therapy       |

194

195 Screening

196 Journals will be manually screened to confirm that they publish in English, are in a  
 197 relevant format (e.g., not a textbook, magazine, etc.), and are currently publishing. From the  
 198 remaining list of journals that are indexed in MEDLINE, search strategies will be used to  
 199 identify observational studies in the relevant topic areas (see Supplementary File 1). The filter  
 200 for observational studies is a combination of a study design search filter for cohort and case-  
 201 control studies by BMJ Evidence Centre information specialists, Fraser et al.'s work on  
 202 identifying observational studies in surgical interventions, and consultations with a medical  
 203 librarian [31,32].

204 From the remaining list of journals that publish observational studies, field-specific  
 205 search strategies (detailed in Supplementary File 1) will be used. Extensions were used as a  
 206 starting point and extant systematic reviews provided additional guidance, particularly for  
 207 RECORD and STROBE-AMS [33,34]. In the case of EULAR, a combination approach will not  
 208 be used as this is the only extension where the broad subject term is the exact focus of the  
 209 extension; the search strategy for observational studies will still be used.

1  
2  
3 210 The results of the OVID MEDLINE field-specific and observational search strategies will  
4  
5  
6 211 be compared to the list of journals that the search was run on to determine inclusion and  
7  
8 212 exclusion. This combination approach will be used for several reasons. Firstly, journal  
9  
10 213 information from NLM is given in more structured manner and allows for easy matching  
11  
12  
13 214 between sets with overlapping Broad Subject Terms. For example, both STROBE-AMS and  
14  
15 215 STROME-ID use the term “Anti-Infective Agents” while both STROBE-ME and STROME-ID  
16  
17 216 use “Molecular Biology.” This approach is also less resource-intensive and allows us to more  
18  
19  
20 217 easily identify how many journals in each field publish observational studies, thus establishing  
21  
22 218 the extent and importance of the issue.  
23

24  
25 21926  
27 220 Data Extraction

28  
29  
30 221 Eligible journals and their websites will be searched exhaustively for any mention of  
31  
32 222 STROBE extensions in their instructions for authors, guidelines for reviewers, other guidance  
33  
34 223 documents, or ethical policies. Data will be extracted by the first author (MKS). To inspect  
35  
36 224 reliability, another researcher (DH) will extract data from 10% of the sample and agreement will  
37  
38  
39 225 be calculated. Primary data sources (i.e., website pages) will be downloaded in pdf format and  
40  
41 226 relevant text describing guideline endorsement will be extracted and coded into a standard data  
42  
43  
44 227 extraction sheet in Excel. Although STROBE and its extensions are the main focus of this  
45  
46 228 investigation, we will also collect information about endorsement of other common guidelines  
47  
48  
49 229 such as CONSORT, PRISMA, ICMJE’s Recommendations for the Conduct, Reporting, Editing,  
50  
51 230 and Publication of Scholarly work in Medical Journals and mentions of organizations like  
52  
53 231 EQUATOR and COPE [13,15,35–37]. This information will be gathered to see if journals that  
54  
55  
56  
57  
58  
59  
60

1  
2  
3 232 endorse other reporting guidelines or ethical reporting guidance, are more likely to endorse  
4  
5  
6 233 STROBE or an extension.  
7

8 234 Altman and Hopewell's classification schema will be used as a starting point for the  
9  
10 235 development of a typology of endorsement for STROBE and extensions [6,38,39]. We anticipate  
11  
12 236 that there will be several categories of endorsement ranging from strong to weak. Some  
13  
14  
15 237 examples include a requirement of a completed checklist with manuscript submission, a  
16  
17 238 suggestion that authors "should" reference or follow a specific guideline, a vague suggestion that  
18  
19 239 author should adhere to reporting guidelines, a vague suggestion that authors should adhere to  
20  
21  
22 240 certain standards which include reference to reporting guidelines, or not explicit mention at all.  
23

24  
25 241 In addition to information regarding support for STROBE and its extensions, general  
26  
27 242 information about the journal such as impact factor, publisher, and contact information for the  
28  
29 243 editorial offices will be collected. For the purposes of future analyses focused on completeness  
30  
31 244 of reporting, it will also be noted if journals have recently launched and have not been publishing  
32  
33  
34 245 for at least two years prior to the publication of its related extension; this will ensure the ability  
35  
36 246 to establish baseline data on the completeness of reporting. For example, STREGA was  
37  
38 247 published in 2009, therefore journals must have begun publishing by 2007 to be included in latter  
39  
40  
41 248 assessments.  
42

43  
44 249 As publishers often provide additional resources for authors, we will collect information  
45  
46 250 from the websites of publishers about their methods of endorsement. Endorsement from  
47  
48 251 publishers will be considered to be indirect methods of support as they require significant effort  
49  
50 252 on the part of the user seeking the information. Information communicated directly through the  
51  
52  
53 253 journal's website will be considered to be direct if it is supplied in immediately available  
54  
55 254 resources to authors.  
56  
57  
58  
59  
60

255

256 Statistical Analyses

257 Endorsement, types of endorsement, and journal characteristics (e.g. Impact factor,  
258 publisher) will be expressed using descriptive statistics such as counts, means/medians, and  
259 percentages. For analyses comparing two binary variables (i.e., endorsement of extensions and  
260 endorsement of other reporting guidelines), unadjusted odds ratios and their associated 95%  
261 confidence intervals will be conducted. Differences in impact factors between endorsing and  
262 non-endorsing journals will be assessed with the Wilcoxon test of ranks, equivalent to the c-stat,  
263 c-index or area under the receiver operating characteristic (ROC) curve. All confidence intervals  
264 will be provided at the two-sided 95% level.

265

## 266 DISCUSSION

267 An evaluation of the extensions provides a deeper understanding of content areas that are  
268 adequately detailed or in need of elaboration. By identifying the content areas that authors have  
269 difficulties with, the groundwork will be laid for an assessment into how authors currently use  
270 and understand STROBE and what difficulties they encounter with its implementation. This  
271 study will provide us with potential hypotheses for future survey for authors, focused both on the  
272 perceived sufficiency of STROBE and the extensions as this could be a barrier to use. For  
273 example, if we find non-specific additions in parts of STROBE, we may focus on those parts  
274 when inquiring authors' opinions about adequacy of STROBE. The qualitative assessment will  
275 also allow us to identify key areas (e.g., particular sections of the methods, results, conclusion)  
276 that may be commonly misunderstood to specifically probe authors about these points.

277 Results from this study will also provide estimates of the frequency and typology of  
278 endorsement. This dataset will allow journals to be targeted in order to promote guideline usage

1  
2  
3 279 and will establish a groundwork for follow-up studies on attitudes related to endorsement of  
4  
5 280 STROBE and its extensions. Perhaps most importantly, this study will provide the foundation for  
6  
7  
8 281 assessing the impact that endorsement has on the completeness of reporting. The data collected  
9  
10 282 through this study will generate important insights for the design of future studies such as  
11  
12 283 feasibility or pilot studies to estimate the effects of endorsement. Perceived lack of tangible  
13  
14 284 benefit due to a weak evidence-base can be a major barrier to guideline use. Testing a  
15  
16 285 relationship between endorsement and an increase in completeness of reporting, can provide the  
17  
18 286 much-needed data to address skeptic's concerns about the tangible value of supporting STROBE  
19  
20 287 and its extensions.  
21  
22  
23  
24

25 288 This study will solidify the scope of the problem of insufficient support and use of  
26  
27 289 STROBE extensions, detail variability in endorsement typology, and establish data for future  
28  
29 290 studies focused on the effects of endorsement on completeness of reporting and attitudes towards  
30  
31 291 STROBE and its extensions.  
32  
33  
34  
35  
36  
37  
38  
39  
40  
41  
42  
43  
44  
45  
46  
47  
48  
49  
50  
51  
52  
53  
54  
55  
56  
57  
58  
59  
60

1  
2  
3 292 **SUPPLEMENTARY INFORMATION**

4 293 **Ethics and dissemination**

5 294 Ethical approval was not needed for this study as there will be no human participants in this  
6 295 study. All data is publicly available.

7 296

8 297 **Authors' contributions**

9 298 All authors have made substantive intellectual contributions to the development of this protocol.  
10 299 MKS conceptualized the study and led the writing of the manuscript. DH led the supervision of  
11 300 the manuscript preparation. MKS and AU developed the search strategies. All authors provided  
12 301 detailed comments on earlier drafts and approved the final manuscript.

13 302

14 303 **Funding statement**

15 304 This work was supported by the European Union's Horizon 2020 research and innovation  
16 305 programme under the Marie Skłodowska-Curie grant agreement No 676207.

17 306

18 307 **Competing interests statement**

19 308 EW is a Fellow of the UK EQUATOR Centre. This is an unpaid position but she has been paid  
20 309 to run training courses associated with the EQUATOR Network, and by other organizations,  
21 310 which promote the use of reporting guidelines such as STROBE. The EQUATOR Network is  
22 311 also a member of the Methods in Research on Research Network, which MKS, DH, EW, LG,  
23 312 and EC are members of. MKS has a placement with the EQUATOR Network as part of her  
24 313 doctoral studies. The other authors declare that they have no competing interests.

25 314

26 315 **Data sharing statement**

27 316 The final datasets supporting the conclusions of the research proposed in this protocol will be  
28 317 available in the Zenodo repository in the Methods in Research on Research (MiRoR) community  
29 318 [<https://zenodo.org/communities/mirror/>]. This study has been pre-registered at the Open Science  
30 319 Framework ([osf.io/u75gb](https://osf.io/u75gb)).

31 320

32 321 **Acknowledgements**

33 322 The authors would like to acknowledge the Methods in Research on Research (MiRoR)  
34 323 consortium for their support and guidance

35 324

36 325 **Supporting information**

37 326 **Supplementary File 1.** Ovid MEDLINE Search Strategies

38 327

39 328

40 329

41 330

42 331

43 332

44 333

45 334

46 335

47 336

48 337

49

50

51

52

53

54

55

338 **REFERENCES**

- 339 1 Vandembroucke JP, von Elm E, Altman DG, *et al.* Strengthening the Reporting of  
340 Observational Studies in Epidemiology (STROBE): Explanation and Elaboration.  
341 *Epidemiology* 2007;**18**:805–35. doi:10.1097/EDE.0b013e3181577511
- 342 2 ICMJE | Recommendations | Defining the Role of Authors and Contributors.  
343 [http://www.icmje.org/recommendations/browse/roles-and-responsibilities/defining-the-role-](http://www.icmje.org/recommendations/browse/roles-and-responsibilities/defining-the-role-of-authors-and-contributors.html)  
344 [of-authors-and-contributors.html](http://www.icmje.org/recommendations/browse/roles-and-responsibilities/defining-the-role-of-authors-and-contributors.html) (accessed 7 Dec 2016).
- 345 3 Hirst A, Altman DG. Are Peer Reviewers Encouraged to Use Reporting Guidelines? A  
346 Survey of 116 Health Research Journals. *PLOS ONE* 2012;**7**:e35621.  
347 doi:10.1371/journal.pone.0035621
- 348 4 Nedovic D, Panic N, Pastorino R, *et al.* Evaluation of the Endorsement of the STrengthening  
349 the REporting of Genetic Association Studies (STREGA) Statement on the Reporting  
350 Quality of Published Genetic Association Studies. *J Epidemiol* 2016;**26**, **26**:399, 399–404.  
351 doi:10.2188/jea.JE20150173
- 352 5 Stevens A, Shamseer L, Weinstein E, *et al.* Relation of completeness of reporting of health  
353 research to journals' endorsement of reporting guidelines: systematic review. *BMJ*  
354 2014;**348**:g3804. doi:10.1136/bmj.g3804
- 355 6 Hopewell S, Ravaud P, Baron G, *et al.* Effect of editors' implementation of CONSORT  
356 guidelines on the reporting of abstracts in high impact medical journals: interrupted time  
357 series analysis. *BMJ* 2012;**344**:e4178.
- 358 7 Grindlay DJ, Dean RS, Christopher MM, *et al.* A survey of the awareness, knowledge,  
359 policies and views of veterinary journal Editors-in-Chief on reporting guidelines for  
360 publication of research. *BMC Vet Res* 2014;**10**, **10**:10, 10–10. doi:10.1186/1746-6148-10-10,  
361 10.1186/1746-6148-10-10
- 362 8 Cobo E, Cortés J, Ribera JM, *et al.* Effect of using reporting guidelines during peer review  
363 on quality of final manuscripts submitted to a biomedical journal: masked randomised trial.  
364 *BMJ* 2011;**343**:d6783. doi:10.1136/bmj.d6783
- 365 9 Johansen M, Thomsen SF. Guidelines for Reporting Medical Research: A Critical Appraisal.  
366 *Int Sch Res Not* 2016;**2016**. doi:10.1155/2016/1346026
- 367 10 Hua F, Walsh T, Glenny A-M, *et al.* Surveys on Reporting Guideline Usage in Dental  
368 Journals. *J Dent Res* 2016;**95**:1207–13. doi:10.1177/0022034516657803
- 369 11 Kunath F, Grobe HR, Rücker G, *et al.* Do Journals Publishing in the Field of Urology  
370 Endorse Reporting Guidelines? A Survey of Author Instructions. *Urol Int* 2011;**88**:54–9.  
371 doi:10.1159/000332742
- 372 12 Pouwels KB, Widyakusuma NN, Groenwold RH, *et al.* Quality of reporting of confounding  
373 remained suboptimal after the STROBE guideline. *J Clin Epidemiol* 2016;**69**:217–24.  
374 doi:/10.1016/j.jclinepi.2015.08.009



- 1  
2  
3 375 13 Schulz KF, Altman DG, Moher D, *et al.* CONSORT 2010 statement: updated guidelines for  
4 376 reporting parallel group randomised trials. *PLoS Med* 2010;**7**:e1000251.  
5 377 doi:10.1371/journal.pmed.1000251  
6  
7  
8 378 14 The EQUATOR Network. Reporting guidelines | The EQUATOR Network.  
9 379 <http://www.equator->  
10 380 [network.org/?post\\_type=eq\\_guidelines&eq\\_guidelines\\_study\\_design=0&eq\\_guidelines\\_clinical\\_specialty=0&eq\\_guidelines\\_report\\_section=0&s=+STROBE+extension&btn\\_submit=Search+Reporting+Guidelines](http://www.equator-network.org/?post_type=eq_guidelines&eq_guidelines_study_design=0&eq_guidelines_clinical_specialty=0&eq_guidelines_report_section=0&s=+STROBE+extension&btn_submit=Search+Reporting+Guidelines) (accessed 16 Mar 2017).  
11 381  
12 382  
13  
14  
15 383 15 The EQUATOR Network. Reporting guidelines | The EQUATOR Network.  
16 384 <http://www.equator->  
17 385 [network.org/?post\\_type=eq\\_guidelines&eq\\_guidelines\\_study\\_design=0&eq\\_guidelines\\_clinical\\_specialty=0&eq\\_guidelines\\_report\\_section=0&s=+CONSORT+extension&btn\\_submit=Search+Reporting+Guidelines](http://www.equator-network.org/?post_type=eq_guidelines&eq_guidelines_study_design=0&eq_guidelines_clinical_specialty=0&eq_guidelines_report_section=0&s=+CONSORT+extension&btn_submit=Search+Reporting+Guidelines) (accessed 16 Mar 2017).  
18 386  
19 387  
20  
21  
22 388 16 Hallgren KA. Computing Inter-Rater Reliability for Observational Data: An Overview and  
23 389 Tutorial. *Tutor Quant Methods Psychol* 2012;**8**:23–34.  
24  
25 390 17 Dixon WG, Carmona L, Finckh A, *et al.* EULAR points to consider when establishing,  
26 391 analysing and reporting safety data of biologics registers in rheumatology. *Ann Rheum Dis*  
27 392 2010;**69**:1596. doi: 10.1136/ard.2009.125526  
28  
29  
30 393 18 Gallo V, Egger M, McCormack V, *et al.* Strengthening the Reporting of OBservational  
31 394 studies in Epidemiology – Molecular Epidemiology (STROBE-ME): An extension of the  
32 395 STROBE statement. *Eur J Clin Invest* 2012;**42**:1–16. doi:10.1111/j.1365-2362.2011.02561.x  
33  
34 396 19 Field N, Cohen T, Struelens MJ, *et al.* Strengthening the Reporting of Molecular  
35 397 Epidemiology for Infectious Diseases (STROME-ID): an extension of the STROBE  
36 398 statement. *Lancet Infect Dis* 2014;**14**:341–52. doi:10.1016/S1473-3099(13)70324-4  
37  
38  
39 399 20 White RG, Hakim AJ, Salganik MJ, *et al.* Strengthening the Reporting of Observational  
40 400 Studies in Epidemiology for respondent-driven sampling studies: “STROBE-RDS”  
41 401 statement. *J Clin Epidemiol* 2015;**68**:1463–71. doi:10.1016/j.jclinepi.2015.04.002  
42  
43 402 21 Benchimol EI, Smeeth L, Guttman A, *et al.* The REporting of studies Conducted using  
44 403 Observational Routinely-collected health Data (RECORD) Statement. *PLoS Med*  
45 404 2015;**12**:e1001885. doi:10.1371/journal.pmed.1001885  
46  
47  
48 405 22 Tacconelli E, Cataldo MA, Paul M, *et al.* STROBE-AMS: recommendations to optimise  
49 406 reporting of epidemiological studies on antimicrobial resistance and informing improvement  
50 407 in antimicrobial stewardship. *BMJ Open* 2016;**6**:e010134. doi:10.1136/bmjopen-2015-  
51 408 010134  
52  
53  
54 409 23 Creinin MD, Chen MJ. Medical abortion reporting of efficacy: the MARE guidelines.  
55 410 *Contraception* 2016;**94**:97–103. doi:10.1016/j.contraception.2016.04.013  
56  
57  
58  
59  
60



- 1  
2  
3 411 24 Lachat C, Hawwash D, Ocké MC, *et al.* Strengthening the Reporting of Observational  
4 412 Studies in Epidemiology—Nutritional Epidemiology (STROBE-nut): An Extension of the  
5 413 STROBE Statement. *PLOS Med* 2016;**13**:e1002036. doi:10.1371/journal.pmed.1002036  
6  
7  
8 414 25 Horby PW, Laurie KL, Cowling BJ, *et al.* CONSISE statement on the reporting of  
9 415 Seroepidemiologic Studies for influenza (ROSES-I statement): an extension of the STROBE  
10 416 statement. *Influenza Other Respir Viruses* 2017;**11**:2–14. doi:10.1111/irv.12411  
11  
12 417 26 Cheng A, Kessler D, Mackinnon R, *et al.* Reporting guidelines for health care simulation  
13 418 research: extensions to the CONSORT and STROBE statements. *Adv Simul* 2016;**1**:25.  
14 419 doi:10.1186/s41077-016-0025-y  
15  
16  
17 420 27 Fitchett EJA, Seale AC, Vergnano S, *et al.* Strengthening the Reporting of Observational  
18 421 Studies in Epidemiology for Newborn Infection (STROBE-NI): an extension of the  
19 422 STROBE statement for neonatal infection research. *Lancet Infect Dis* 2016;**16**:e202–13.  
20 423 doi:10.1016/S1473-3099(16)30082-2  
21  
22  
23 424 28 Sargeant J m., O'Connor A m., Dohoo I r., *et al.* Methods and Processes of Developing the  
24 425 Strengthening the Reporting of Observational Studies in Epidemiology – Veterinary  
25 426 (STROBE-Vet) Statement. *J Vet Intern Med* 2016;**30**:1887–95. doi:10.1111/jvim.14574  
26  
27 427 29 currentlyindexed - NLM Catalog - NCBI.  
28 428 <https://www.ncbi.nlm.nih.gov/nlmcatalog/?term=currentyindexed> (accessed 8 Mar 2017).  
29  
30  
31 429 30 Master Journal List - Clarivate Analytics. <http://ip-science.thomsonreuters.com/mjl/>  
32 430 (accessed 17 Mar 2017).  
33  
34 431 31 Fraser C, Murray A, Burr J. Identifying observational studies of surgical interventions in  
35 432 MEDLINE and EMBASE. *BMC Med Res Methodol* 2006;**6**:41. doi:10.1186/1471-2288-6-41  
36  
37 433 32 Study design search filters.  
38 434 <http://clinicalevidence.bmj.com/x/set/static/ebm/learn/665076.html> (accessed 22 Jun 2017).  
39  
40  
41 435 33 Raftery J, Roderick P, Stevens A. Potential use of routine databases in health technology  
42 436 assessment. *Health Technol Assess Winch Engl* 2005;**9**:1–92, iii–iv.  
43  
44 437 34 Filice G, Drekonja D, Greer N, *et al.* *Antimicrobial Stewardship Programs in Inpatient*  
45 438 *Settings: A Systematic Review*. Washington (DC): Department of Veterans Affairs (US)  
46 439 2013. <http://www.ncbi.nlm.nih.gov/books/NBK253513/> (accessed 3 May 2017).  
47  
48  
49 440 35 Moher D, Liberati A, Tetzlaff J, *et al.* Preferred Reporting Items for Systematic Reviews and  
50 441 Meta-Analyses: The PRISMA Statement. *PLOS Med* 2009;**6**:e1000097.  
51 442 doi:10.1371/journal.pmed.1000097  
52  
53 443 36 ICMJE | Recommendations. <http://www.icmje.org/recommendations/> (accessed 1 May  
54 444 2017).  
55  
56  
57  
58  
59  
60

- 1  
2  
3 445 37 Committee on Publication Ethics: COPE | Promoting integrity in research publication.  
4 446 <https://publicationethics.org/> (accessed 1 May 2017).  
5  
6  
7 447 38 Altman DG. Endorsement of the CONSORT statement by high impact medical journals:  
8 448 survey of instructions for authors. *BMJ* 2005;**330**:1056–7. doi:10.1136/bmj.330.7499.1056  
9  
10 449 39 Hopewell S, Altman DG, Moher D, *et al.* Endorsement of the CONSORT Statement by high  
11 450 impact factor medical journals: a survey of journal editors and journal “Instructions to  
12 451 Authors.” *Trials* 2008;**9**:20. doi:10.1186/1745-6215-9-20  
13  
14  
15 452

For peer review only

## Supplementary File 1. Ovid MEDLINE Search Strategies

All searches use the following database:

Database: Ovid MEDLINE(R) Epub Ahead of Print, In-Process & Other Non-Indexed Citations, Ovid MEDLINE(R) Daily and Ovid MEDLINE(R) <1946 to Present>

For each extension (except for EULAR), the observational strategy (14) is combined with the field-specific strategy (or/15-xx) and restricted to search only within the list of eligible journals (“journal name” or “journal name 2” ...or “journal name n”...),jn. within a certain time frame (limit xx to year=”2 years prior to extension publication – 2017”).

### *Identifying Observational Studies*

1. Observational study/
2. (observational adj3 stud\$.tw.
3. exp Cohort Studies/
4. cohort\$.tw.
5. controlled clinical trial.pt.
6. Epidemiologic Methods/
7. exp case-control studies/
8. (case\$ adj3 control\$).tw.
9. Comparative Study/
10. prospective\$.tw.
11. retrospective\$.tw.
12. Cross-Sectional Studies/
13. prevalence/
14. or/1-13

### *Identifying Journal Publishing Studies in the Relevant Field*

#### STREGA

15. exp Genetic Association Studies/
16. exp Polymorphism, Genetic/
17. exp Genetic Predisposition to Disease/
18. exp Genetic Research/
19. genome-wide association.tw.
20. genomewide association.tw
21. genetic research.tw.
22. gene\$ polymorphism.tw.
23. gene\$ association.tw.
24. or/15-23

#### STROBE-EULAR

No field-specific search strategy necessary due to specificity of broad subject term. The observational filter is still used in combination with the eligible journal pool.

#### STROBE-ME

15. exp molecular epidemiology/

1  
2  
3  
4  
5  
6  
7  
8  
9  
10  
11  
12  
13  
14  
15  
16  
17  
18  
19  
20  
21  
22  
23  
24  
25  
26  
27  
28  
29  
30  
31  
32  
33  
34  
35  
36  
37  
38  
39  
40  
41  
42  
43  
44  
45  
46  
47  
48  
49  
50  
51  
52  
53  
54  
55  
56  
57  
58  
59  
60

- 47 16. exp Biomarkers/  
48 17. Molecular epidemiolog\$.tw.  
49 18. Genetic epidemiolog\$.tw.  
50 19. Biomarker\$.tw.  
51 20. Bio-marker\$.tw.  
52 21. Or/15-20  
53  
54 STROME-ID  
55 15. Molecular Epidemiology/  
56 16. molecular epidemiolog\$.tw.  
57 17. exp Communicable Diseases/ep [Epidemiology]  
58 18. exp Infection Control/  
59 19. infection\$.tw.  
60 20. exp Molecular Typing/  
61 21. molecular typing.tw.  
62 22. molecular marker\$.tw.  
63 23. molecular clock.tw.  
64 24. multiple-strain.tw.  
65 25. or/15-24  
66  
67 RECORD  
68 15. exp Records as Topic/  
69 16. Registries/  
70 17. database/ or dataset/  
71 18. exp Information Systems/  
72 19. (data or dataset or database or register or registry or registries or record\$.tw.  
73 20. or/15-19  
74  
75 STROBE-RDS  
76 15. respondent driven.tw.  
77 16. respondentdriven.tw.  
78 17. participant driven.tw.  
79 18. or/15-17  
80  
81 STROBE-AMS  
82 15. exp Anti-Infective Agents/  
83 16. exp Infection/  
84 17. (antibiot\$ or antimicrob\$.tw.  
85 18. exp Drug Resistance, Microbial/  
86 19. Vancomycin/  
87 20. exp Aminoglycosides/  
88 21. exp Fluoroquinolones/  
89 22. exp Carbapenems/  
90 23. exp Cephalosporins/  
91 24. (vancomycin or aminoglycosides or fluoroquinolones or carbapenems or cephalosporins).tw.  
92 25. or/15-24

# BMJ Open

## The STROBE extensions: A protocol for a qualitative assessment of content and a survey of endorsement

|                                 |                                                                                                                                                                                                                                                                                                                                                                                                                                                                                                                                                                                                                                                                              |
|---------------------------------|------------------------------------------------------------------------------------------------------------------------------------------------------------------------------------------------------------------------------------------------------------------------------------------------------------------------------------------------------------------------------------------------------------------------------------------------------------------------------------------------------------------------------------------------------------------------------------------------------------------------------------------------------------------------------|
| Journal:                        | <i>BMJ Open</i>                                                                                                                                                                                                                                                                                                                                                                                                                                                                                                                                                                                                                                                              |
| Manuscript ID                   | bmjopen-2017-019043.R2                                                                                                                                                                                                                                                                                                                                                                                                                                                                                                                                                                                                                                                       |
| Article Type:                   | Protocol                                                                                                                                                                                                                                                                                                                                                                                                                                                                                                                                                                                                                                                                     |
| Date Submitted by the Author:   | 27-Sep-2017                                                                                                                                                                                                                                                                                                                                                                                                                                                                                                                                                                                                                                                                  |
| Complete List of Authors:       | Sharp, Melissa K; Universite Paris Descartes, Pierre Louis Doctoral School: Epidemiology and Biomedical Sciences; Sveuciliste u Splitu, Department of Psychology, Faculty of Humanities and Social Sciences<br>Utrobičić, Ana; Sveuciliste u Splitu, School of Medicine<br>Gómez, Guadalupe; Universitat Politecnica de Catalunya, Departament d'Estadística i Investigació Operativa<br>Cobo, Erik; Universitat Politecnica Catalunya, Departament d'Estadística i Investigació Operativa<br>Wager, Elizabeth; Sideview; Sveuciliste u Splitu, School of Medicine<br>Hren, Darko; Sveuciliste u Splitu, Department of Psychology, Faculty of Humanities and Social Sciences |
| <b>Primary Subject Heading</b>: | Medical publishing and peer review                                                                                                                                                                                                                                                                                                                                                                                                                                                                                                                                                                                                                                           |
| Secondary Subject Heading:      | Research methods                                                                                                                                                                                                                                                                                                                                                                                                                                                                                                                                                                                                                                                             |
| Keywords:                       | Reporting Guidelines, STROBE, observational studies, information dissemination/methods, bibliometrics                                                                                                                                                                                                                                                                                                                                                                                                                                                                                                                                                                        |
|                                 |                                                                                                                                                                                                                                                                                                                                                                                                                                                                                                                                                                                                                                                                              |

SCHOLARONE™  
Manuscripts

only

1  
2  
3  
4 1  
5 2  
6  
7 3  
8  
9 4 The STROBE extensions: A protocol for a qualitative assessment of content and a survey of  
10 5 endorsement  
11  
12 6

13  
14 7 Melissa K. Sharp<sup>1,2</sup>, Ana Utrobičić<sup>3</sup>, Guadalupe Gómez<sup>4</sup>, Erik Cobo<sup>4</sup>, Elizabeth Wager<sup>5,3</sup>, Darko  
15 8 Hren<sup>1</sup>  
16  
17 9

18  
19 10 <sup>1</sup> University of Split, Department of Psychology, Faculty of Humanities and Social Sciences,  
20 11 Split, Croatia

21  
22 12 <sup>2</sup> Université Paris Descartes, Sorbonne Paris Cité, Pierre Louis Doctoral School: Epidemiology  
23 13 and Biomedical Sciences, Paris, France

24  
25 14 <sup>3</sup> University of Split, School of Medicine, Split, Croatia

26  
27 15 <sup>4</sup> Universitat Politècnica de Catalunya-BarcelonaTech, Departament d'Estadística i Investigació  
28 16 Operativa, Barcelona, Spain

29  
30 17 <sup>5</sup> Sideview, Buckinghamshire, United Kingdom  
31  
32 18

33 19  
34  
35 20  
36  
37 21 \*Corresponding author:

38  
39 22 Melissa K Sharp

40  
41 23 University of Split

42  
43 24 Livanjska ulica 5, Split, Croatia 21000

44  
45 25 Email: [msharp@unist.hr](mailto:msharp@unist.hr)

46  
47 26 Tel: +1 248 701 8109; +385 097 632 4542  
48  
49 27

50  
51 28 **Word Count:** 2642  
52  
53 29  
54  
55  
56  
57  
58  
59  
60

1  
2  
3  
4  
5  
6  
7  
8  
9  
10  
11  
12  
13  
14  
15  
16  
17  
18  
19  
20  
21  
22  
23  
24  
25  
26  
27  
28  
29  
30  
31  
32  
33  
34  
35  
36  
37  
38

## 30 Abstract

31 **Introduction:** The STrengthening the Reporting of OBservational studies in Epidemiology  
32 (STROBE) Statement was developed in response to inadequate reporting of observational  
33 studies. In recent years, several extensions to STROBE have been created to provide more  
34 nuanced field-specific guidance for authors. The content and the prevalence of extension  
35 endorsement has not yet been assessed. Accordingly, there are two aims: 1) to classify changes  
36 made in the extensions to identify strengths and weaknesses of the original STROBE checklist;  
37 and 2) to determine the prevalence and typology of endorsement by journals in fields related to  
38 extensions.

39 **Methods and analysis:** Two independent researchers will assess additions in each extension.  
40 Additions will be coded as “field-specific” (FS) or “not field-specific” (NFS). FS is defined as  
41 particularly relevant information for a single field and guidance provided generally cannot be  
42 extrapolated beyond that field. NFS is defined as information that reflects epidemiological or  
43 methodological tenets and can be generalized to most, if not all, types of observational research  
44 studies. Intra-class correlation (ICC) will be calculated to measure reviewers’ concordance.  
45 Upon disagreement, consensus will be sought. Individual additions will be grouped by STROBE  
46 checklist items to identify the frequency and distribution of changes.

47 Journals in fields related to extensions will be identified through National Library of Medicine  
48 (NLM) PubMed Broad Subject Terms, screened for eligibility, and further distilled via Ovid  
49 MEDLINE search strategies for observational studies. Text describing endorsement will be  
50 extracted from each journal’s website. A classification scheme will be created for endorsement  
51 types and the prevalence of endorsement will be estimated. Analyses will utilize NVivo 11 and  
52 SAS University Edition.

53 **Ethics and dissemination:** This study does not require ethical approval as it does not involve  
54 human participants. This study has been pre-registered on Open Science Framework.

55 **Word count:** 290

56 **Keywords:** Reporting guidelines, STROBE, observational studies, information  
57 dissemination/methods, bibliometrics

1  
2  
3 58 **Strengths and limitations of this study**  
4

- 5 59
- 6 60 • Our systematic approach to qualitatively assess the content of the additions made in the  
7 61 STROBE extensions provides a comprehensive overview of the types of changes made  
8 62 and can identify redundancies and problem areas.
  - 9 63 • Our method involves standardized search strategies in Ovid MEDLINE, designed to  
10 64 capture a representative sample and circumvent issues of subjectivity in the identification  
11 65 of eligible journals
  - 12 66 • This study will create an open source corpus of recent observational studies spanning  
13 67 seven fields which future researchers can utilize to assess completeness of reporting or  
14 68 other topics of interest.
  - 15 69 • The bibliometric aspect of this study only focuses on 7 extensions and fields so results  
16 are not generalizable to other studies.  
17  
18  
19  
20  
21  
22  
23  
24  
25  
26  
27  
28  
29  
30  
31  
32  
33  
34  
35  
36  
37  
38  
39  
40  
41  
42  
43  
44  
45  
46  
47  
48  
49  
50  
51  
52  
53  
54  
55  
56  
57  
58  
59  
60



## 70 INTRODUCTION

71 The STrengthening the Reporting of OBServational studies in Epidemiology (STROBE)  
72 Statement was developed in 2007 in response to the pervasiveness of inadequate reporting of  
73 observational studies. STROBE provides a checklist of items that serve as a reference for how to  
74 report sufficient information for observational research involving cohort, case-control, and cross-  
75 sectional studies [1]. The guidelines have been endorsed by the International Committee of  
76 Medical Journal Editors (ICMJE) and the accompanying checklist is sometimes explicitly used  
77 as a requirement for manuscript submission [2]. However, there is no standard method of  
78 endorsement by journals and little is known about the most effective ways to apply the  
79 guidelines in practice [3–5].

80 Regarding the reporting of clinical trials, requiring a completed Consolidated Standards  
81 of Reporting Trials (CONSORT) checklist upon submission of a manuscript has been shown to  
82 lead to improvements in reporting [6]. However, some journals do not want to take responsibility  
83 for guideline enforcement and many overlook non-adherence to guidelines; editors have  
84 expressed beliefs that their journal's current policies are adequate or that they fear losing authors  
85 to other journals that have less strict requirements for publication [7–9]. Editors may also be  
86 unaware of the existence of guidelines, as demonstrated by low endorsement rates by journals in  
87 dentistry [10], veterinary medicine [7], and urology [11]. On the other hand, the evidence for the  
88 endorsement of STROBE is also mixed. Endorsement was not shown to be associated with better  
89 reporting for items related to confounding, regardless of strength [12].

90 Several field-specific extensions to STROBE have been designed in recent years in an  
91 effort to promote complete reporting, provide more nuanced guidance for authors, and perhaps  
92 address editor's concerns that STROBE is not focused enough for their journal. Extensions for

1  
2  
3 93 other reporting guidelines are common, however the creation of extensions for STROBE seems  
4  
5  
6 94 to outpace those for other reporting guidelines such as the CONSORT [13]. Since the publication  
7  
8 95 of STROBE in 2007, 13 extensions have been published and indexed by the Enhancing the  
9  
10 96 QUALity and Transparency Of health Research (EQUATOR) Network, an international  
11  
12 97 collaboration that promotes transparent and accurate reporting and indexes reporting guidelines  
13  
14  
15 98 [14]. In contrast, CONSORT was first published in 1996, updated in 2001 and further revised in  
16  
17 99 2010, yet only 17 extensions have been published during that period [15]. The reason behind the  
18  
19  
20 100 difference in the pacing of publications of extensions is unclear. Perhaps the concept of field-  
21  
22 101 specific extensions to reporting guidelines were pioneered by CONSORT, thus making the idea  
23  
24 102 more commonplace for subsequent reporting guidelines. Alternatively, the complexity of the  
25  
26  
27 103 types of observational research studies may require more guidance due to the wide variety of  
28  
29 104 methods employed in observational studies. Regardless of the reasoning, it is evident that authors  
30  
31 105 are still perceiving a need to provide more guidance on how to report information about their  
32  
33  
34 106 studies. However, until now, many of these initiatives have not been evaluated.

35  
36  
37 107 Extensions to STROBE offer a potential new avenue for promoting more complete  
38  
39 108 reporting but their use has been largely unassessed and, similar to STROBE, they may face  
40  
41 109 implementation and usage problems [3,7]. Being intended as general guidelines for observational  
42  
43 110 studies, STROBE should include *necessary* information that is *sufficient* to most observational  
44  
45 111 studies. For some fields, however, STROBE guidelines may not be sufficient due to specific  
46  
47 112 requirements within the field. This gap is then covered by an extension for that field. However,  
48  
49 113 when extensions include non-specific guidance that can be extrapolated to most observational  
50  
51 114 studies (e.g. details about participants, settings, confounders, follow-up, biases or any other  
52  
53  
54 115 general epidemiological constructs), it suggests potential deficiencies in STROBE checklist. If  
55  
56  
57  
58  
59  
60

1  
2  
3 116 the content is already in STROBE, extension authors may have thought that it was not clearly  
4  
5  
6 117 communicated, or that it is necessary to include it in the checklist instead of being only in the  
7  
8 118 explanation and elaboration document. Whilst, if the content is not already in STROBE,  
9  
10 119 extension authors may have identified a gap or insufficiency which should be considered as an  
11  
12 120 addendum to STROBE. Therefore, by identifying non-specific or redundant guidance suggested  
13  
14 121 in the STROBE extensions, we will be able to identify perceived gaps and deficiencies in the  
15  
16 122 current STROBE checklist and potentially reduce future waste in the process of extension  
17  
18 123 creation.

21  
22  
23 124 A perceived lack of confidence in reporting guidelines can impact journal editors'  
24  
25 125 willingness to endorse reporting guidelines. Currently, it is unclear if and how journals are  
26  
27 126 encouraging or requiring authors to use STROBE extensions. As journals are key players  
28  
29 127 influencing the use and uptake of extensions, the prevalence and typology of extension  
30  
31 128 endorsement is needed to understand the variety of methods employed to encourage transparent  
32  
33 129 reporting. Data collected from this study can later be used as the groundwork for an evaluation of  
34  
35 130 the impact of endorsement on the completeness of reporting.

### 36 37 38 39 40 131 **Aims**

41  
42  
43 132 The objectives of this study are twofold. Firstly, to qualitatively assess and classify the  
44  
45 133 changes made in the extensions to help to identify the strengths and weaknesses of the original  
46  
47 134 STROBE checklist; this will identify potential problem areas or deficiencies conveyed in  
48  
49 135 extension additions. Secondly, we will estimate the prevalence of endorsement in journals that  
50  
51 136 publish observational studies from extension-related fields and create an endorsement typology  
52  
53 137 to provide a finer detailed view of the promotion of the STROBE extensions.  
54  
55  
56  
57  
58  
59  
60

## 138 **METHODS AND ANALYSIS**

### 139 **Qualitative Assessment and Analysis**

140 The main focus of this phase will be on coding the additions that are made in each  
141 extension. Coded additions will help to identify the strengths, weaknesses and redundancies  
142 conveyed in the STROBE extensions in order to provide guidance for modifications to the  
143 original STROBE checklist and to identify target areas for future educational interventions.

144 We will assess the content of 13 STROBE extensions which were identified through the  
145 EQUATOR Network website as well as through a PubMed search for STROBE-related  
146 publications. Two independent reviewers (DH, MKS) will code the additions made in each  
147 STROBE extension; disagreement will be resolved by consensus. Each sub-item on an extension  
148 that is attached to a STROBE checklist item will be coded individually by the relevant content  
149 area (e.g., item 5 sub-item additions a, b, and c, will be counted and coded as three separate  
150 items). Each sub-item will also be coded as “field-specific” (FS) or “not field-specific” (NFS).  
151 FS is defined as information that is particularly relevant for a single field and guidance provided  
152 cannot be generalized beyond that particular extension’s field. Items which note phrases such as  
153 “including,” “specifically,” “for example,” and “e.g.” followed by a field-specific example,  
154 generally are considered to be field-specific as these items are adding additional information  
155 specific to a certain topic area. NFS is defined as information that reflects general  
156 epidemiological or methodological tenets and can be extrapolated to most, if not all, types of  
157 observational research studies.

158 For the subjective assessments of the field-specific or not field-specific nature of the  
159 additions (rated as binary yes or no), intra-class correlation (ICC) will be used to assess the inter-

1  
2  
3 160 rater reliability (IRR). The ICC for the two raters will be calculated for ratings across all 13  
4  
5 161 extensions that involve the subjective assessment of an item as field-specific or not. This method  
6  
7  
8 162 was chosen because ICC does not take an all-or-nothing approach to agreement but rather it  
9  
10 163 “incorporates the magnitude of disagreement to compute IRR estimates” [16]. Descriptive  
11  
12 164 statistics such as counts, means, and percentages will be given.

## 165 **Endorsement Survey**

### 166 Eligibility Criteria

167 Extensions to the STROBE guidelines were identified through the EQUATOR Network  
168 website as well as through a search on PubMed. Extensions are eligible for assessment if at least  
169 one year has passed since publication as this allows for some time for endorsement and  
170 implementation. In the case of multiple publications of an extension, the earliest  
171 publication/availability date will be used to determine eligibility. As of March 1, 2017, eligible  
172 extensions are detailed in Table 1 while ineligible extensions are detailed in Table 2.

173 **Table 1.** Extensions Eligible for Assessment

| Abbreviation       | Title/Description                                                                                           | Publication Date |
|--------------------|-------------------------------------------------------------------------------------------------------------|------------------|
| STREGA [4]         | STrengthening the REporting of Genetic Association Studies                                                  | February 3, 2009 |
| STROBE-EULAR [17]* | A EULAR extension of STROBE guidelines                                                                      | June 4, 2010     |
| STROBE-ME [18]     | STrengthening the Reporting of OBServational studies in Epidemiology - Molecular Epidemiology               | October 24, 2011 |
| STROME-ID [19]     | Strengthening the Reporting of Molecular Epidemiology for Infectious Diseases                               | March 13, 2014   |
| STROBE-RDS [20]    | Strengthening the Reporting of Observational Studies in Epidemiology for Respondent-Driven Sampling studies | May 1, 2015      |
| RECORD [21]        | REporting of studies Conducted using Observational Routinely-collected health Data (RECORD) Statement       | October 6, 2015  |

|                 |                                                                                                    |                   |
|-----------------|----------------------------------------------------------------------------------------------------|-------------------|
| STROBE-AMS [22] | Strengthening the Reporting of Observational Studies in Epidemiology for AntiMicrobial Stewardship | February 19, 2016 |
|-----------------|----------------------------------------------------------------------------------------------------|-------------------|

174 \* This extension does not have an official acronym. For simplicity's sake, this will be used.

175

176 **Table 2.** Extensions Not Eligible for Assessment

| Abbreviation    | Title/Description                                                                                  | Publication Date   |
|-----------------|----------------------------------------------------------------------------------------------------|--------------------|
| MARE-S [23]     | Medical Abortion Reporting of Efficacy - STROBE                                                    | April 23, 2016     |
| STROBE-NUT [24] | Strengthening the Reporting of Observational Studies in Epidemiology-NUTritional epidemiology      | June 7, 2016       |
| ROSES-I [25]    | CONSISE statement on the REporting of SEroepidemiologic Studies for influenza                      | July 17, 2016      |
| STROBE-SBR [26] | Strengthening the Reporting of Observational Studies in Epidemiology for Simulation-Based Research | July 26, 2016      |
| STROBE-NI [27]  | Strengthening the Reporting of Observational Studies in Epidemiology for Newborn Infection         | September 13, 2016 |
| STROBE-Vet [28] | Strengthening the Reporting of Observational Studies in Epidemiology – Veterinary                  | November 1, 2016   |

177

178 Identification of Journals

179 Journals in fields related to extensions will be identified using the National Library of  
 180 Medicine (NLM) Catalog which contains, among other things, “biomedical and health-related  
 181 life sciences journals” indexed in MEDLINE. As of March 2017, there are over 5,600 journals  
 182 indexed [29]. This database was chosen for two primary reasons: 1) Broad Subject Terms are  
 183 used which allows for easy identification and segmentation of research fields for journals and  
 184 topic areas for articles; and 2) the segmentation of other search engines, namely Clarivate  
 185 Analytics Web of Science Journal List [30], did not clearly align with extension fields and would  
 186 result in more overwhelming searches with less certainty that potentially eligible journals would  
 187 be identified.

188 Journals will be identified using the following search string in the NLM Catalog:

189 *pubmed*["Broad subject terms"]. If an extension reports search terms in their publication, these  
 190 will be considered as a starting point. All search strategies were developed in collaboration with

1  
2  
3 191 a medical librarian. Further details listing the individual broad subject terms used for each  
4  
5  
6 192 extension are detailed in Table 3.

7  
8 193 **Table 3.** Broad Subject Terms

| STROBE Extension | Broad Subject Term(s)                     |
|------------------|-------------------------------------------|
| STREGA           | Genetics, Genetics, Medical               |
| STROBE-EULAR     | Rheumatology                              |
| STROBE-ME        | Molecular Biology                         |
| STROME-ID        | Molecular Biology, Anti-Infective Agents  |
| STROBE-RDS       | Public Health                             |
| RECORD           | Health Services, Health Services Research |
| STROBE-AMS       | Anti-Infective Agents, Drug Therapy       |

194

195 Screening

196 Journals will be manually screened to confirm that they publish in English, are in a  
197 relevant format (e.g., not a textbook, magazine, etc.), and are currently publishing. From the  
198 remaining list of journals that are indexed in MEDLINE, search strategies will be used to  
199 identify observational studies in the relevant topic areas (see Supplementary File 1). The filter  
200 for observational studies is a combination of a study design search filter for cohort and case-  
201 control studies by BMJ Evidence Centre information specialists, Fraser et al.'s work on  
202 identifying observational studies in surgical interventions, and consultations with a medical  
203 librarian [31,32].

204 From the remaining list of journals that publish observational studies, field-specific  
205 search strategies (detailed in Supplementary File 1) will be used. Extensions were used as a  
206 starting point and extant systematic reviews provided additional guidance, particularly for  
207 RECORD and STROBE-AMS [33,34]. In the case of EULAR, a combination approach will not  
208 be used as this is the only extension where the broad subject term is the exact focus of the  
209 extension; the search strategy for observational studies will still be used.



1  
2  
3 210 The results of the OVID MEDLINE field-specific and observational search strategies will  
4  
5  
6 211 be compared to the list of journals that the search was run on to determine inclusion and  
7  
8 212 exclusion. This combination approach will be used for several reasons. Firstly, journal  
9  
10 213 information from NLM is given in more structured manner and allows for easy matching  
11  
12  
13 214 between sets with overlapping Broad Subject Terms. For example, both STROBE-AMS and  
14  
15 215 STROME-ID use the term “Anti-Infective Agents” while both STROBE-ME and STROME-ID  
16  
17 216 use “Molecular Biology.” This approach is also less resource-intensive and allows us to more  
18  
19  
20 217 easily identify how many journals in each field publish observational studies, thus establishing  
21  
22 218 the extent and importance of the issue.  
23  
24

25 219

## 27 220 Data Extraction

28  
29  
30 221 Eligible journals and their websites will be searched exhaustively for any mention of  
31  
32 222 STROBE extensions in their instructions for authors, guidelines for reviewers, other guidance  
33  
34 223 documents, or ethical policies. Data will be extracted by the first author (MKS). To inspect  
35  
36 224 reliability, another researcher (DH) will extract data from 10% of the sample and agreement will  
37  
38  
39 225 be calculated. Primary data sources (i.e., website pages) will be downloaded in pdf format and  
40  
41 226 relevant text describing guideline endorsement will be extracted and coded into a standard data  
42  
43  
44 227 extraction sheet in Excel. Although STROBE and its extensions are the main focus of this  
45  
46 228 investigation, we will also collect information about endorsement of other common guidelines  
47  
48  
49 229 such as CONSORT, PRISMA, ICMJE’s Recommendations for the Conduct, Reporting, Editing,  
50  
51 230 and Publication of Scholarly work in Medical Journals and mentions of organizations like  
52  
53 231 EQUATOR and COPE [13,15,35–37]. This information will be gathered to see if journals that  
54  
55  
56  
57  
58  
59  
60



1  
2  
3 232 endorse other reporting guidelines or ethical reporting guidance, are more likely to endorse  
4  
5 233 STROBE or an extension.  
6  
7

8 234 Altman and Hopewell's classification schema will be used as a starting point for the  
9  
10 235 development of a typology of endorsement for STROBE and extensions [6,38,39]. The initial  
11  
12 236 approach will be to codify endorsements into several categories of ranging from active, passive,  
13  
14 237 and not-endorsing. Some examples include a requirement of a completed checklist with  
15  
16 238 manuscript submission (e.g., active), a suggestion that authors "should" reference or follow a  
17  
18 239 specific guideline (e.g., passive strong), a vague suggestion that author should adhere to  
19  
20 240 reporting guidelines (e.g., passive moderate), a vague suggestion that authors should adhere to  
21  
22 241 certain standards which include reference to reporting guidelines (e.g., passive weak), or no  
23  
24 242 explicit mention at all (e.g., not endorsing).  
25  
26  
27  
28

29 243 In addition to information regarding support for STROBE and its extensions, general  
30  
31 244 information about the journal such as impact factor, publisher, and contact information for the  
32  
33 245 editorial offices will be collected. For the purposes of future analyses focused on completeness  
34  
35 246 of reporting, it will also be noted if journals have recently launched and have not been publishing  
36  
37 247 for at least two years prior to the publication of its related extension; this will ensure the ability  
38  
39 248 to establish baseline data on the completeness of reporting. For example, STREGA was  
40  
41 249 published in 2009, therefore journals must have begun publishing by 2007 to be included in latter  
42  
43 250 assessments.  
44  
45  
46  
47

48 251 As publishers often provide additional resources for authors, we will collect information  
49  
50 252 from the websites of publishers about their methods of endorsement. Endorsement from  
51  
52 253 publishers will be considered to be indirect methods of support as they require significant effort  
53  
54 254 on the part of the user seeking the information. Information communicated directly through the  
55  
56  
57  
58  
59  
60

1  
2  
3 255 journal's website will be considered to be direct if it is supplied in immediately available  
4  
5 256 resources to authors.  
6  
7

8 257  
9

## 10 258 Statistical Analyses

11  
12  
13 259 Endorsement, types of endorsement, and journal characteristics (e.g. Impact factor,  
14  
15 260 publisher) will be expressed using descriptive statistics such as counts, means/medians, and  
16  
17 261 percentages. For analyses comparing two binary variables (i.e., endorsement of extensions and  
18  
19 262 endorsement of other reporting guidelines), unadjusted odds ratios and their associated 95%  
20  
21 263 confidence intervals will be conducted. Differences in impact factors between endorsing and  
22  
23 264 non-endorsing journals will be assessed with the Wilcoxon test of ranks, equivalent to the c-stat,  
24  
25 265 c-index or area under the receiver operating characteristic (ROC) curve. All confidence intervals  
26  
27 266 will be provided at the two-sided 95% level.  
28  
29  
30  
31

32 267  
33

## 34 268 **DISCUSSION**

35  
36 269 An evaluation of the extensions provides a deeper understanding of content areas that are  
37  
38 270 adequately detailed or in need of elaboration. By identifying the content areas that authors have  
39  
40 271 difficulties with, the groundwork will be laid for an assessment into how authors currently use  
41  
42 272 and understand STROBE and what difficulties they encounter with its implementation. This  
43  
44 273 study will provide us with potential hypotheses for future survey for authors, focused both on the  
45  
46 274 perceived sufficiency of STROBE and the extensions as this could be a barrier to use. For  
47  
48 275 example, if we find non-specific additions in parts of STROBE, we may focus on those parts  
49  
50 276 when inquiring authors' opinions about adequacy of STROBE. The qualitative assessment will  
51  
52 277 also allow us to identify key areas (e.g., particular sections of the methods, results, conclusion)  
53  
54 278 that may be commonly misunderstood to specifically probe authors about these points.  
55  
56  
57  
58  
59  
60

1  
2  
3 279 Results from this study will also provide estimates of the frequency and typology of  
4  
5  
6 280 endorsement. This dataset will allow journals to be targeted in order to promote guideline usage  
7  
8 281 and will establish a groundwork for follow-up studies on attitudes related to endorsement of  
9  
10 282 STROBE and its extensions. Perhaps most importantly, this study will provide the foundation for  
11  
12 283 assessing the impact that endorsement has on the completeness of reporting. The data collected  
13  
14 284 through this study will generate important insights for the design of future studies such as  
15  
16 285 feasibility or pilot studies to estimate the effects of endorsement. Perceived lack of tangible  
17  
18 286 benefit due to a weak evidence-base can be a major barrier to guideline use. Testing a  
19  
20 287 relationship between endorsement and an increase in completeness of reporting, can provide the  
21  
22 288 much-needed data to address skeptic's concerns about the tangible value of supporting STROBE  
23  
24 289 and its extensions.  
25  
26  
27  
28

29 290 This study will solidify the scope of the problem of insufficient support and use of  
30  
31 291 STROBE extensions, detail variability in endorsement typology, and establish data for future  
32  
33 292 studies focused on the effects of endorsement on completeness of reporting and attitudes towards  
34  
35 293 STROBE and its extensions.  
36  
37  
38  
39  
40  
41  
42  
43  
44  
45  
46  
47  
48  
49  
50  
51  
52  
53  
54  
55  
56  
57  
58  
59  
60

1  
2  
3 294 **SUPPLEMENTARY INFORMATION**

4 295 **Ethics and dissemination**

5 296 Ethical approval was not needed for this study as there will be no human participants in this  
6 297 study. All data is publicly available.

7 298

8 299 **Authors' contributions**

9 300 All authors have made substantive intellectual contributions to the development of this protocol.  
10 301 MKS conceptualized the study and led the writing of the manuscript. DH led the supervision of  
11 302 the manuscript preparation. MKS and AU developed the search strategies. All authors provided  
12 303 detailed comments on earlier drafts and approved the final manuscript.

13 304

14 305 **Funding statement**

15 306 This work was supported by the European Union's Horizon 2020 research and innovation  
16 307 programme under the Marie Skłodowska-Curie grant agreement No 676207.

17 308

18 309 **Competing interests statement**

19 310 EW is a Fellow of the UK EQUATOR Centre. This is an unpaid position but she has been paid  
20 311 to run training courses associated with the EQUATOR Network, and by other organizations,  
21 312 which promote the use of reporting guidelines such as STROBE. The EQUATOR Network is  
22 313 also a member of the Methods in Research on Research Network, which MKS, DH, EW, LG,  
23 314 and EC are members of. MKS has a placement with the EQUATOR Network as part of her  
24 315 doctoral studies. The other authors declare that they have no competing interests.

25 316

26 317 **Data sharing statement**

27 318 The final datasets supporting the conclusions of the research proposed in this protocol will be  
28 319 available in the Zenodo repository in the Methods in Research on Research (MiRoR) community  
29 320 [<https://zenodo.org/communities/mirror/>]. This study has been pre-registered at the Open Science  
30 321 Framework ([osf.io/u75gb](https://osf.io/u75gb)).

31 322

32 323 **Acknowledgements**

33 324 The authors would like to acknowledge the Methods in Research on Research (MiRoR)  
34 325 consortium for their support and guidance

35 326

36 327 **Supporting information**

37 328 **Supplementary File 1.** Ovid MEDLINE Search Strategies

38 329

39 330

40 331

41 332

42 333

43 334

44 335

45 336

46 337

47 338

48 339

49

50

51

52

53

54

55

## 340 REFERENCES

- 341 1 Vandembroucke JP, von Elm E, Altman DG, *et al.* Strengthening the Reporting of  
342 Observational Studies in Epidemiology (STROBE): Explanation and Elaboration.  
343 *Epidemiology* 2007;**18**:805–35. doi:10.1097/EDE.0b013e3181577511
- 344 2 ICMJE | Recommendations | Defining the Role of Authors and Contributors.  
345 [http://www.icmje.org/recommendations/browse/roles-and-responsibilities/defining-the-role-](http://www.icmje.org/recommendations/browse/roles-and-responsibilities/defining-the-role-of-authors-and-contributors.html)  
346 [of-authors-and-contributors.html](http://www.icmje.org/recommendations/browse/roles-and-responsibilities/defining-the-role-of-authors-and-contributors.html) (accessed 7 Dec 2016).
- 347 3 Hirst A, Altman DG. Are Peer Reviewers Encouraged to Use Reporting Guidelines? A  
348 Survey of 116 Health Research Journals. *PLOS ONE* 2012;**7**:e35621.  
349 doi:10.1371/journal.pone.0035621
- 350 4 Nedovic D, Panic N, Pastorino R, *et al.* Evaluation of the Endorsement of the STrengthening  
351 the REporting of Genetic Association Studies (STREGA) Statement on the Reporting  
352 Quality of Published Genetic Association Studies. *J Epidemiol* 2016;**26**, **26**:399, 399–404.  
353 doi:10.2188/jea.JE20150173
- 354 5 Stevens A, Shamseer L, Weinstein E, *et al.* Relation of completeness of reporting of health  
355 research to journals' endorsement of reporting guidelines: systematic review. *BMJ*  
356 2014;**348**:g3804. doi:10.1136/bmj.g3804
- 357 6 Hopewell S, Ravaud P, Baron G, *et al.* Effect of editors' implementation of CONSORT  
358 guidelines on the reporting of abstracts in high impact medical journals: interrupted time  
359 series analysis. *BMJ* 2012;**344**:e4178.
- 360 7 Grindlay DJ, Dean RS, Christopher MM, *et al.* A survey of the awareness, knowledge,  
361 policies and views of veterinary journal Editors-in-Chief on reporting guidelines for  
362 publication of research. *BMC Vet Res* 2014;**10**, **10**:10, 10–10. doi:10.1186/1746-6148-10-10,  
363 10.1186/1746-6148-10-10
- 364 8 Cobo E, Cortés J, Ribera JM, *et al.* Effect of using reporting guidelines during peer review  
365 on quality of final manuscripts submitted to a biomedical journal: masked randomised trial.  
366 *BMJ* 2011;**343**:d6783. doi:10.1136/bmj.d6783
- 367 9 Johansen M, Thomsen SF. Guidelines for Reporting Medical Research: A Critical Appraisal.  
368 *Int Sch Res Not* 2016;**2016**. doi:10.1155/2016/1346026
- 369 10 Hua F, Walsh T, Glenny A-M, *et al.* Surveys on Reporting Guideline Usage in Dental  
370 Journals. *J Dent Res* 2016;**95**:1207–13. doi:10.1177/0022034516657803
- 371 11 Kunath F, Grobe HR, Rücker G, *et al.* Do Journals Publishing in the Field of Urology  
372 Endorse Reporting Guidelines? A Survey of Author Instructions. *Urol Int* 2011;**88**:54–9.  
373 doi:10.1159/000332742
- 374 12 Pouwels KB, Widyakusuma NN, Groenwold RH, *et al.* Quality of reporting of confounding  
375 remained suboptimal after the STROBE guideline. *J Clin Epidemiol* 2016;**69**:217–24.  
376 doi:/10.1016/j.jclinepi.2015.08.009

- 1  
2  
3 377 13 Schulz KF, Altman DG, Moher D, *et al.* CONSORT 2010 statement: updated guidelines for  
4 378 reporting parallel group randomised trials. *PLoS Med* 2010;**7**:e1000251.  
5 379 doi:10.1371/journal.pmed.1000251  
6  
7  
8 380 14 The EQUATOR Network. Reporting guidelines | The EQUATOR Network.  
9 381 [http://www.equator-](http://www.equator-network.org/?post_type=eq_guidelines&eq_guidelines_study_design=0&eq_guidelines_clinical_specialty=0&eq_guidelines_report_section=0&s=+STROBE+extension&btn_submit=Search+Reporting+Guidelines)  
10 382 [network.org/?post\\_type=eq\\_guidelines&eq\\_guidelines\\_study\\_design=0&eq\\_guidelines\\_clinical\\_specialty=0&eq\\_guidelines\\_report\\_section=0&s=+STROBE+extension&btn\\_submit=Search+Reporting+Guidelines](http://www.equator-network.org/?post_type=eq_guidelines&eq_guidelines_study_design=0&eq_guidelines_clinical_specialty=0&eq_guidelines_report_section=0&s=+STROBE+extension&btn_submit=Search+Reporting+Guidelines) (accessed 16 Mar 2017).  
11 383  
12 384  
13  
14  
15 385 15 The EQUATOR Network. Reporting guidelines | The EQUATOR Network.  
16 386 [http://www.equator-](http://www.equator-network.org/?post_type=eq_guidelines&eq_guidelines_study_design=0&eq_guidelines_clinical_specialty=0&eq_guidelines_report_section=0&s=+CONSORT+extension&btn_submit=Search+Reporting+Guidelines)  
17 387 [network.org/?post\\_type=eq\\_guidelines&eq\\_guidelines\\_study\\_design=0&eq\\_guidelines\\_clinical\\_specialty=0&eq\\_guidelines\\_report\\_section=0&s=+CONSORT+extension&btn\\_submit=Search+Reporting+Guidelines](http://www.equator-network.org/?post_type=eq_guidelines&eq_guidelines_study_design=0&eq_guidelines_clinical_specialty=0&eq_guidelines_report_section=0&s=+CONSORT+extension&btn_submit=Search+Reporting+Guidelines) (accessed 16 Mar 2017).  
18 388  
19 389  
20  
21  
22 390 16 Hallgren KA. Computing Inter-Rater Reliability for Observational Data: An Overview and  
23 391 Tutorial. *Tutor Quant Methods Psychol* 2012;**8**:23–34.  
24  
25 392 17 Dixon WG, Carmona L, Finckh A, *et al.* EULAR points to consider when establishing,  
26 393 analysing and reporting safety data of biologics registers in rheumatology. *Ann Rheum Dis*  
27 394 2010;**69**:1596. doi: 10.1136/ard.2009.125526  
28  
29  
30 395 18 Gallo V, Egger M, McCormack V, *et al.* Strengthening the Reporting of OBservational  
31 396 studies in Epidemiology – Molecular Epidemiology (STROBE-ME): An extension of the  
32 397 STROBE statement. *Eur J Clin Invest* 2012;**42**:1–16. doi:10.1111/j.1365-2362.2011.02561.x  
33  
34 398 19 Field N, Cohen T, Struelens MJ, *et al.* Strengthening the Reporting of Molecular  
35 399 Epidemiology for Infectious Diseases (STROME-ID): an extension of the STROBE  
36 400 statement. *Lancet Infect Dis* 2014;**14**:341–52. doi:10.1016/S1473-3099(13)70324-4  
37  
38  
39 401 20 White RG, Hakim AJ, Salganik MJ, *et al.* Strengthening the Reporting of Observational  
40 402 Studies in Epidemiology for respondent-driven sampling studies: “STROBE-RDS”  
41 403 statement. *J Clin Epidemiol* 2015;**68**:1463–71. doi:10.1016/j.jclinepi.2015.04.002  
42  
43 404 21 Benchimol EI, Smeeth L, Guttman A, *et al.* The REporting of studies Conducted using  
44 405 Observational Routinely-collected health Data (RECORD) Statement. *PLoS Med*  
45 406 2015;**12**:e1001885. doi:10.1371/journal.pmed.1001885  
46  
47  
48 407 22 Tacconelli E, Cataldo MA, Paul M, *et al.* STROBE-AMS: recommendations to optimise  
49 408 reporting of epidemiological studies on antimicrobial resistance and informing improvement  
50 409 in antimicrobial stewardship. *BMJ Open* 2016;**6**:e010134. doi:10.1136/bmjopen-2015-  
51 410 010134  
52  
53  
54 411 23 Creinin MD, Chen MJ. Medical abortion reporting of efficacy: the MARE guidelines.  
55 412 *Contraception* 2016;**94**:97–103. doi:10.1016/j.contraception.2016.04.013  
56  
57  
58  
59  
60



- 1  
2  
3 413 24 Lachat C, Hawwash D, Ocké MC, *et al.* Strengthening the Reporting of Observational  
4 414 Studies in Epidemiology—Nutritional Epidemiology (STROBE-nut): An Extension of the  
5 415 STROBE Statement. *PLOS Med* 2016;**13**:e1002036. doi:10.1371/journal.pmed.1002036  
6  
7  
8 416 25 Horby PW, Laurie KL, Cowling BJ, *et al.* CONSISE statement on the reporting of  
9 417 Seroepidemiologic Studies for influenza (ROSES-I statement): an extension of the STROBE  
10 418 statement. *Influenza Other Respir Viruses* 2017;**11**:2–14. doi:10.1111/irv.12411  
11  
12  
13 419 26 Cheng A, Kessler D, Mackinnon R, *et al.* Reporting guidelines for health care simulation  
14 420 research: extensions to the CONSORT and STROBE statements. *Adv Simul* 2016;**1**:25.  
15 421 doi:10.1186/s41077-016-0025-y  
16  
17 422 27 Fitchett EJA, Seale AC, Vergnano S, *et al.* Strengthening the Reporting of Observational  
18 423 Studies in Epidemiology for Newborn Infection (STROBE-NI): an extension of the  
19 424 STROBE statement for neonatal infection research. *Lancet Infect Dis* 2016;**16**:e202–13.  
20 425 doi:10.1016/S1473-3099(16)30082-2  
21  
22  
23 426 28 Sargeant J m., O'Connor A m., Dohoo I r., *et al.* Methods and Processes of Developing the  
24 427 Strengthening the Reporting of Observational Studies in Epidemiology – Veterinary  
25 428 (STROBE-Vet) Statement. *J Vet Intern Med* 2016;**30**:1887–95. doi:10.1111/jvim.14574  
26  
27 429 29 currentlyindexed - NLM Catalog - NCBI.  
28 430 <https://www.ncbi.nlm.nih.gov/nlmcatalog/?term=currentyindexed> (accessed 8 Mar 2017).  
29  
30  
31 431 30 Master Journal List - Clarivate Analytics. <http://ip-science.thomsonreuters.com/mjl/>  
32 432 (accessed 17 Mar 2017).  
33  
34 433 31 Fraser C, Murray A, Burr J. Identifying observational studies of surgical interventions in  
35 434 MEDLINE and EMBASE. *BMC Med Res Methodol* 2006;**6**:41. doi:10.1186/1471-2288-6-41  
36  
37 435 32 Study design search filters.  
38 436 <http://clinicalevidence.bmj.com/x/set/static/ebm/learn/665076.html> (accessed 22 Jun 2017).  
39  
40  
41 437 33 Raftery J, Roderick P, Stevens A. Potential use of routine databases in health technology  
42 438 assessment. *Health Technol Assess Winch Engl* 2005;**9**:1–92, iii–iv.  
43  
44 439 34 Filice G, Drekonja D, Greer N, *et al.* *Antimicrobial Stewardship Programs in Inpatient*  
45 440 *Settings: A Systematic Review*. Washington (DC): Department of Veterans Affairs (US)  
46 441 2013. <http://www.ncbi.nlm.nih.gov/books/NBK253513/> (accessed 3 May 2017).  
47  
48  
49 442 35 Moher D, Liberati A, Tetzlaff J, *et al.* Preferred Reporting Items for Systematic Reviews and  
50 443 Meta-Analyses: The PRISMA Statement. *PLOS Med* 2009;**6**:e1000097.  
51 444 doi:10.1371/journal.pmed.1000097  
52  
53 445 36 ICMJE | Recommendations. <http://www.icmje.org/recommendations/> (accessed 1 May  
54 446 2017).  
55  
56  
57  
58  
59  
60

- 1  
2  
3 447 37 Committee on Publication Ethics: COPE | Promoting integrity in research publication.  
4 448 <https://publicationethics.org/> (accessed 1 May 2017).  
5  
6  
7 449 38 Altman DG. Endorsement of the CONSORT statement by high impact medical journals:  
8 450 survey of instructions for authors. *BMJ* 2005;**330**:1056–7. doi:10.1136/bmj.330.7499.1056  
9  
10 451 39 Hopewell S, Altman DG, Moher D, *et al.* Endorsement of the CONSORT Statement by high  
11 452 impact factor medical journals: a survey of journal editors and journal “Instructions to  
12 453 Authors.” *Trials* 2008;**9**:20. doi:10.1186/1745-6215-9-20  
14  
15 454

For peer review only



## Supplementary File 1. Ovid MEDLINE Search Strategies

All searches use the following database:

Database: Ovid MEDLINE(R) Epub Ahead of Print, In-Process & Other Non-Indexed Citations, Ovid MEDLINE(R) Daily and Ovid MEDLINE(R) <1946 to Present>

For each extension (except for EULAR), the observational strategy (14) is combined with the field-specific strategy (or/15-xx) and restricted to search only within the list of eligible journals (“journal name” or “journal name 2” ...or “journal name n”...),jn. within a certain time frame (limit xx to year=”2 years prior to extension publication – 2017”).

### *Identifying Observational Studies*

1. Observational study/
2. (observational adj3 stud\$.tw.
3. exp Cohort Studies/
4. cohort\$.tw.
5. controlled clinical trial.pt.
6. Epidemiologic Methods/
7. exp case-control studies/
8. (case\$ adj3 control\$.tw.
9. Comparative Study/
10. prospective\$.tw.
11. retrospective\$.tw.
12. Cross-Sectional Studies/
13. prevalence/
14. or/1-13

### *Identifying Journal Publishing Studies in the Relevant Field*

#### STREGA

15. exp Genetic Association Studies/
16. exp Polymorphism, Genetic/
17. exp Genetic Predisposition to Disease/
18. exp Genetic Research/
19. genome-wide association.tw.
20. genomewide association.tw
21. genetic research.tw.
22. gene\$ polymorphism.tw.
23. gene\$ association.tw.
24. or/15-23

#### STROBE-EULAR

No field-specific search strategy necessary due to specificity of broad subject term. The observational filter is still used in combination with the eligible journal pool.

#### STROBE-ME

15. exp molecular epidemiology/

1  
2  
3  
4  
5  
6  
7  
8  
9  
10  
11  
12  
13  
14  
15  
16  
17  
18  
19  
20  
21  
22  
23  
24  
25  
26  
27  
28  
29  
30  
31  
32  
33  
34  
35  
36  
37  
38  
39  
40  
41  
42  
43  
44  
45  
46  
47  
48  
49  
50  
51  
52  
53  
54  
55  
56  
57  
58  
59  
60

- 47 16. exp Biomarkers/  
48 17. Molecular epidemiolog\$.tw.  
49 18. Genetic epidemiolog\$.tw.  
50 19. Biomarker\$.tw.  
51 20. Bio-marker\$.tw.  
52 21. Or/15-20  
53  
54 STROME-ID  
55 15. Molecular Epidemiology/  
56 16. molecular epidemiolog\$.tw.  
57 17. exp Communicable Diseases/ep [Epidemiology]  
58 18. exp Infection Control/  
59 19. infection\$.tw.  
60 20. exp Molecular Typing/  
61 21. molecular typing.tw.  
62 22. molecular marker\$.tw.  
63 23. molecular clock.tw.  
64 24. multiple-strain.tw.  
65 25. or/15-24  
66  
67 RECORD  
68 15. exp Records as Topic/  
69 16. Registries/  
70 17. database/ or dataset/  
71 18. exp Information Systems/  
72 19. (data or dataset or database or register or registry or registries or record\$.tw.  
73 20. or/15-19  
74  
75 STROBE-RDS  
76 15. respondent driven.tw.  
77 16. respondentdriven.tw.  
78 17. participant driven.tw.  
79 18. or/15-17  
80  
81 STROBE-AMS  
82 15. exp Anti-Infective Agents/  
83 16. exp Infection/  
84 17. (antibiot\$ or antimicrob\$.tw.  
85 18. exp Drug Resistance, Microbial/  
86 19. Vancomycin/  
87 20. exp Aminoglycosides/  
88 21. exp Fluoroquinolones/  
89 22. exp Carbapenems/  
90 23. exp Cephalosporins/  
91 24. (vancomycin or aminoglycosides or fluoroquinolones or carbapenems or cephalosporins).tw.  
92 25. or/15-24
