# Supplementary material for: The STROBE extensions: protocol for a qualitative assessment of content and a survey of endorsement
Source: PubMed Central journal article supplement — BMJ Open. 2017 Oct 22;7(10):e019043. doi: 10.1136/bmjopen-2017-019043 (PMC5665297; doi:10.1136/bmjopen-2017-019043), 2017-10-22
Supplement: bmjopen-2017-019043supp001.pdf [file bmjopen-2017-019043supp001.pdf]

1 **Supplementary File 1. Ovid MEDLINE Search Strategies**

2

3 All searches use the following database:

4 Database: Ovid MEDLINE(R) Epub Ahead of Print, In-Process & Other Non-Indexed Citations,  
5 Ovid MEDLINE(R) Daily and Ovid MEDLINE(R) <1946 to Present>

6

7 For each extension (except for EULAR), the observational strategy (14) is combined with the  
8 field-specific strategy (or/15-xx) and restricted to search only within the list of eligible journals  
9 (“journal name” or “journal name 2” ...or “journal name n”...),jn. within a certain time frame  
10 (limit xx to year=”2 years prior to extension publication – 2017”).

11

12 *Identifying Observational Studies*

- 13 1. Observational study/
- 14 2. (observational adj3 stud\$.tw.
- 15 3. exp Cohort Studies/
- 16 4. cohort\$.tw.
- 17 5. controlled clinical trial.pt.
- 18 6. Epidemiologic Methods/
- 19 7. exp case-control studies/
- 20 8. (case\$ adj3 control\$).tw.
- 21 9. Comparative Study/
- 22 10. prospective\$.tw.
- 23 11. retrospective\$.tw.
- 24 12. Cross-Sectional Studies/
- 25 13. prevalence/
- 26 14. or/1-13

27

28 *Identifying Journal Publishing Studies in the Relevant Field*

29 **STREGA**

- 30 15. exp Genetic Association Studies/
- 31 16. exp Polymorphism, Genetic/
- 32 17. exp Genetic Predisposition to Disease/
- 33 18. exp Genetic Research/
- 34 19. genome-wide association.tw.
- 35 20. genomewide association.tw
- 36 21. genetic research.tw.
- 37 22. gene\$ polymorphism.tw.
- 38 23. gene\$ association.tw.
- 39 24. or/15-23

40

41 **STROBE-EULAR**

42 No field-specific search strategy necessary due to specificity of broad subject term. The  
43 observational filter is still used in combination with the eligible journal pool.

44

45 **STROBE-ME**

- 46 15. exp molecular epidemiology/

47 16. exp Biomarkers/  
 48 17. Molecular epidemiolog\$.tw.  
 49 18. Genetic epidemiolog\$.tw.  
 50 19. Biomarker\$.tw.  
 51 20. Bio-marker\$.tw.  
 52 21. Or/15-20  
 53  
 54 STROME-ID  
 55 15. Molecular Epidemiology/  
 56 16. molecular epidemiolog\$.tw.  
 57 17. exp Communicable Diseases/ep [Epidemiology]  
 58 18. exp Infection Control/  
 59 19. infection\$.tw.  
 60 20. exp Molecular Typing/  
 61 21. molecular typing.tw.  
 62 22. molecular marker\$.tw.  
 63 23. molecular clock.tw.  
 64 24. multiple-strain.tw.  
 65 25. or/15-24  
 66  
 67 RECORD  
 68 15. exp Records as Topic/  
 69 16. Registries/  
 70 17. database/ or dataset/  
 71 18. exp Information Systems/  
 72 19. (data or dataset or database or register or registry or registries or record\$.tw.  
 73 20. or/15-19  
 74  
 75 STROBE-RDS  
 76 15. respondent driven.tw.  
 77 16. respondentdriven.tw.  
 78 17. participant driven.tw.  
 79 18. or/15-17  
 80  
 81 STROBE-AMS  
 82 15. exp Anti-Infective Agents/  
 83 16. exp Infection/  
 84 17. (antibiot\$ or antimicrob\$.tw.  
 85 18. exp Drug Resistance, Microbial/  
 86 19. Vancomycin/  
 87 20. exp Aminoglycosides/  
 88 21. exp Fluoroquinolones/  
 89 22. exp Carbapenems/  
 90 23. exp Cephalosporins/  
 91 24. (vancomycin or aminoglycosides or fluoroquinolones or carbapenems or cephalosporins).tw.  
 92 25. or/15-24
